# Supplementary material for: Evolution Stings: The Origin and Diversification of Scorpion Toxin Peptide Scaffolds
Source: MDPI journal article supplement (doi:10.3390/toxins5122456), 2013-12-13
Supplement: s1 [file s1]

$\beta$  Na<sub>v</sub> CS $\alpha/\beta$

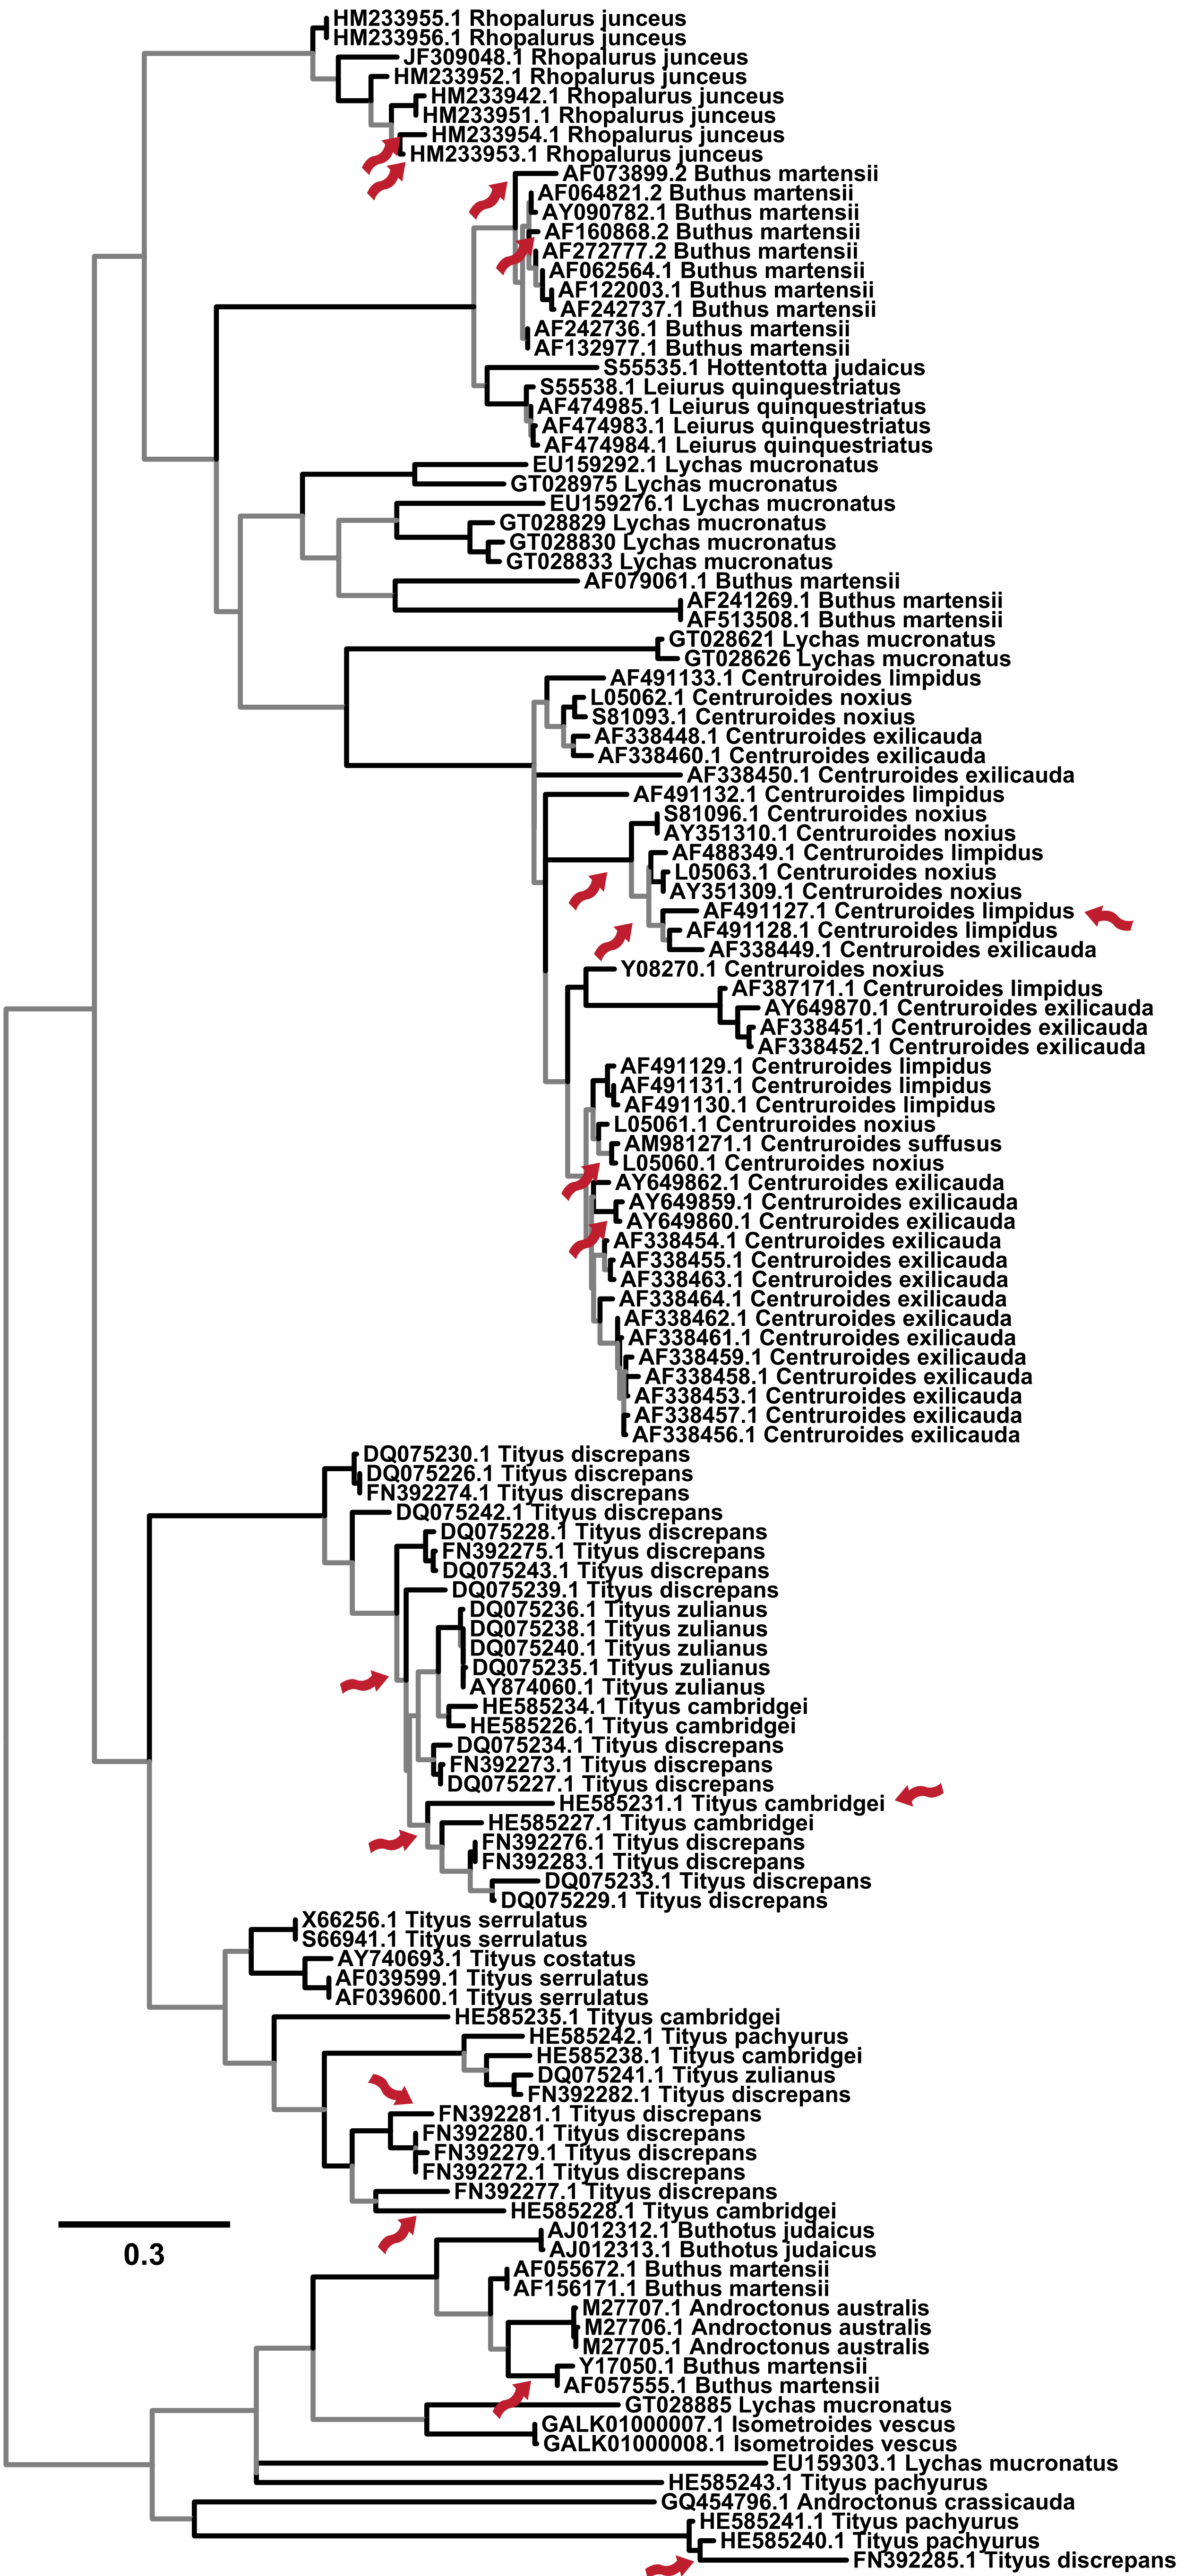

$\alpha$  Na<sub>v</sub> CS $\alpha/\beta$

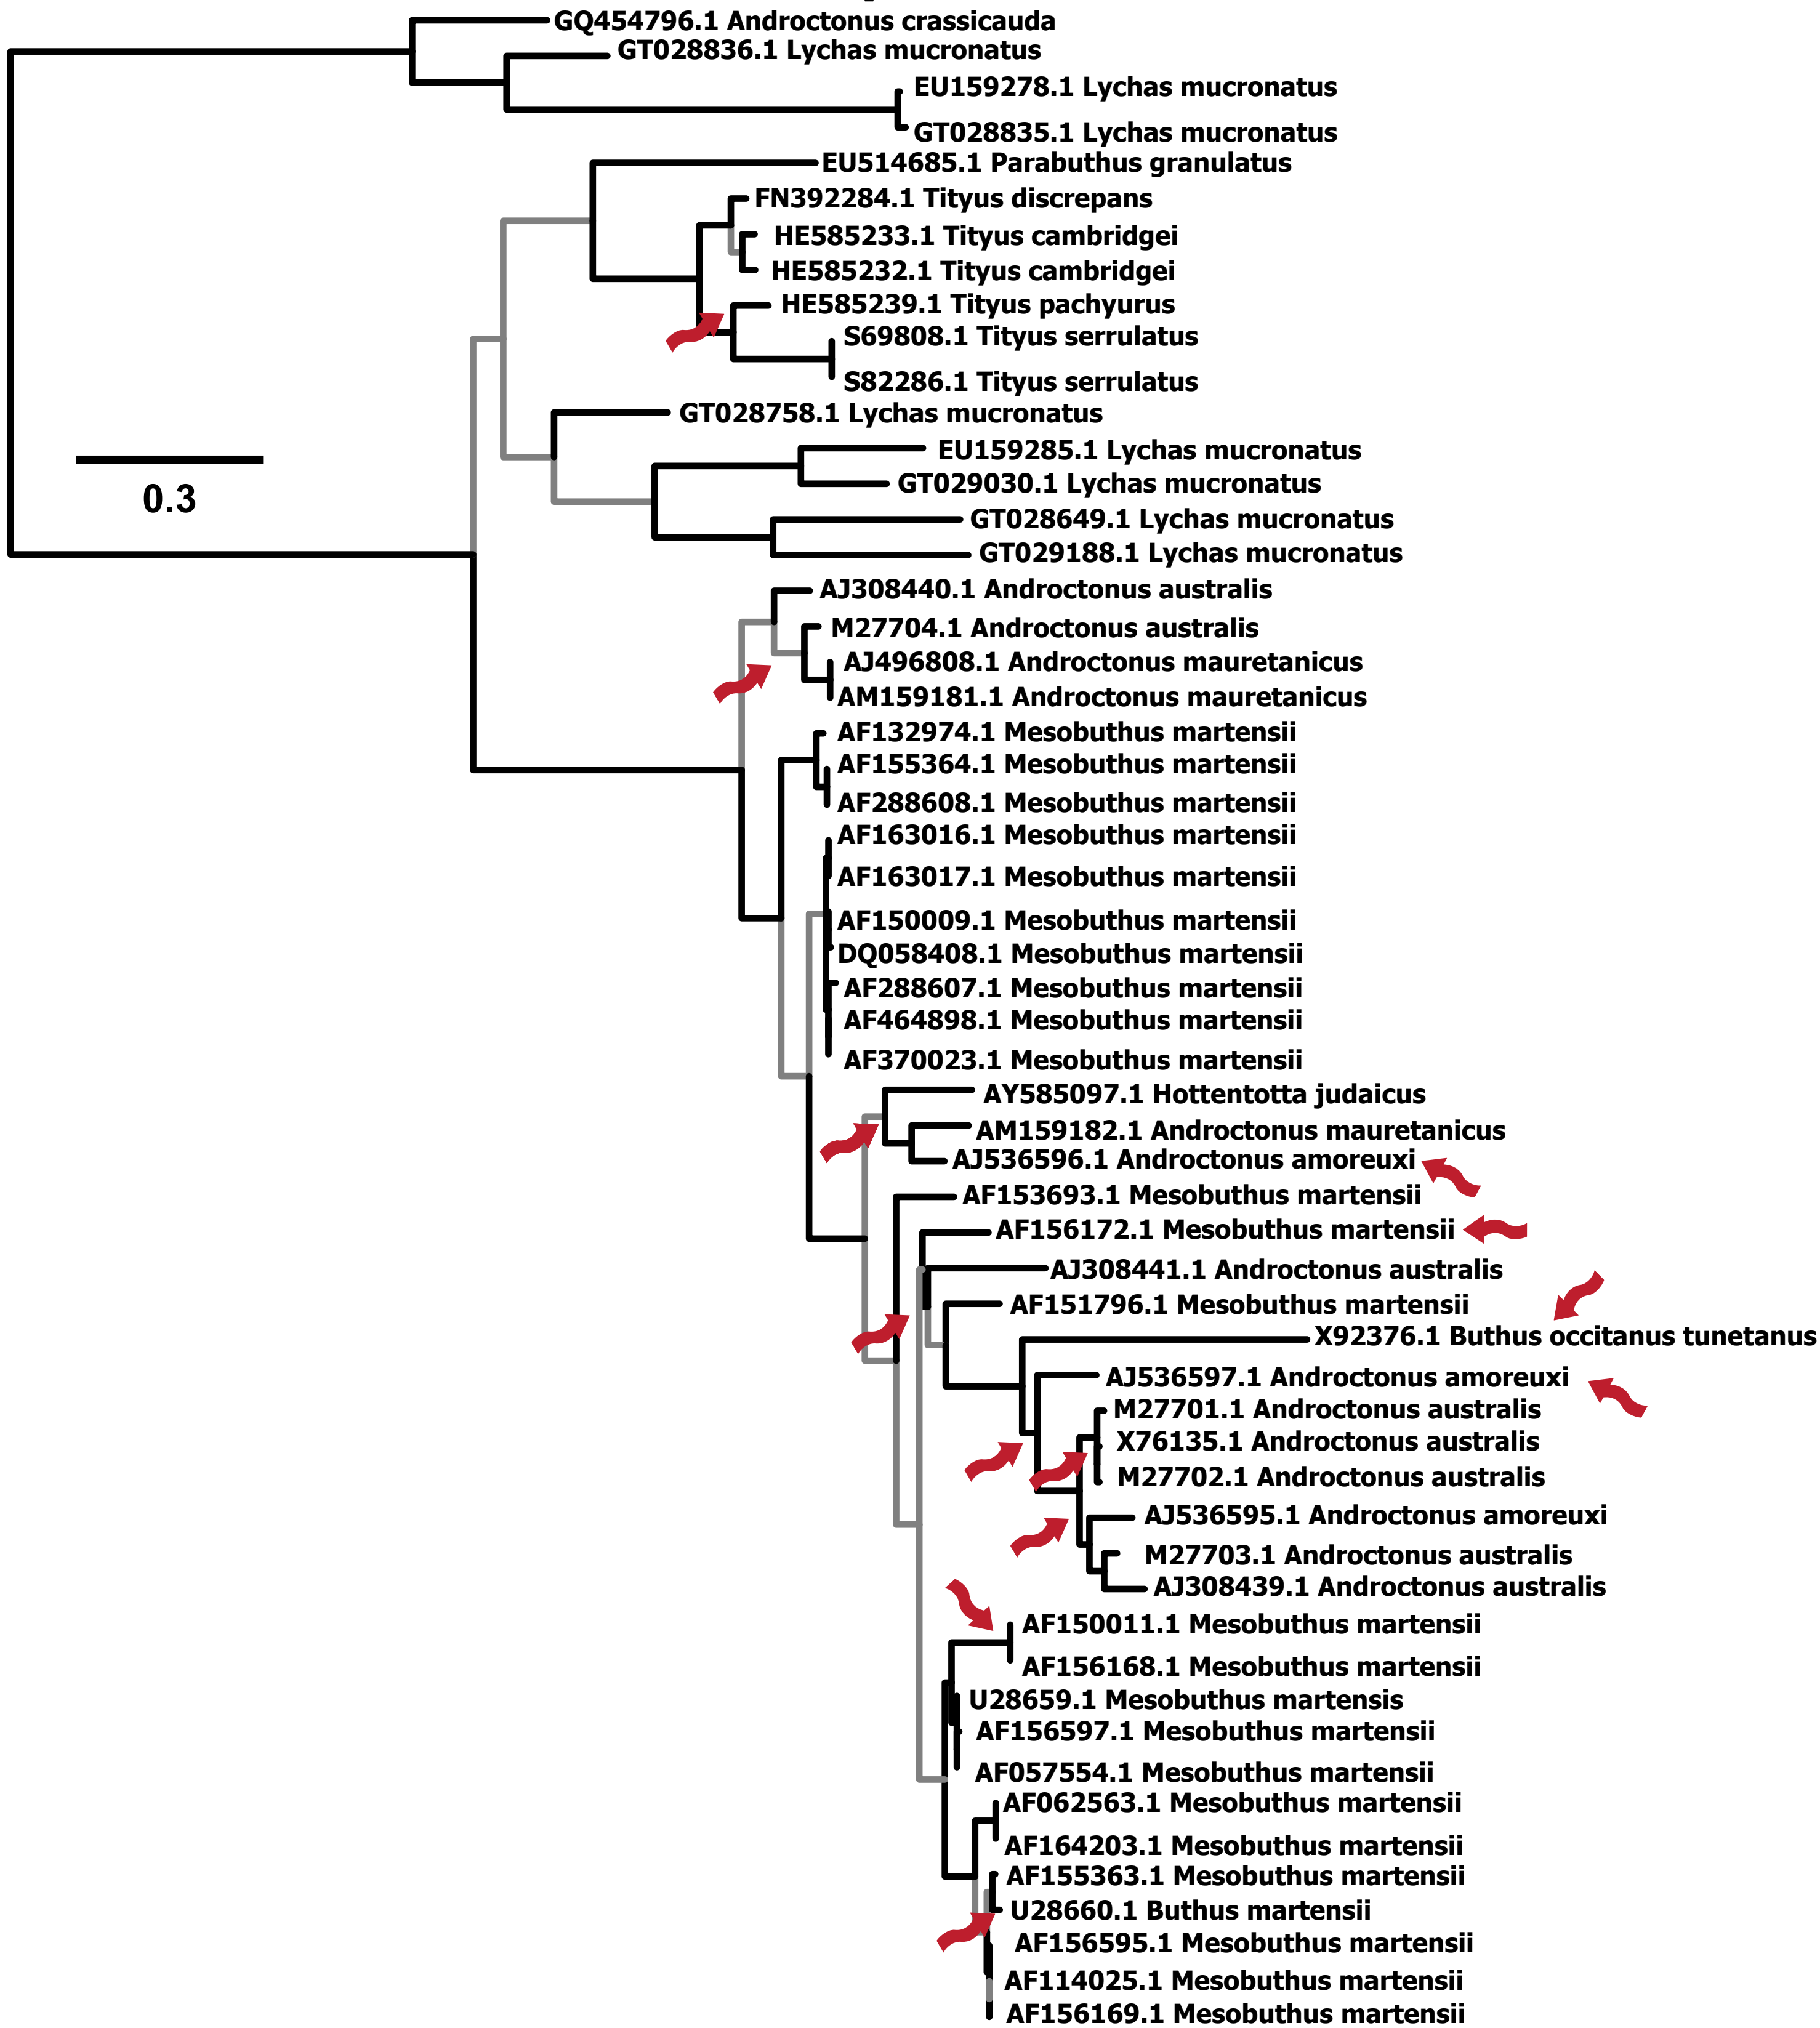

**Episodically diversifying branch**

 Bootstrap > 750

 Bootstrap ≤ 750
