# Supplementary material for: Evolution Stings: The Origin and Diversification of Scorpion Toxin Peptide Scaffolds
Source: MDPI journal article supplement (doi:10.3390/toxins5122456), 2013-12-13
Supplement: s1 [file s1]

# $Cl_v$ $CS\alpha/\beta$

AF155365.1 *Buthus martensii*

AY055475.1 *Buthus martensii*

FJ360815.1 *Buthus occitanus israelis*

FJ360813.1 *Buthus occitanus israelis*

FJ360812.1 *Buthus occitanus israelis*

GU187951.1 *Mesobuthus eupeus*

GU187952.1 *Mesobuthus eupeus*

EF445087.1 *Mesobuthus eupeus*

EF445088.1 *Mesobuthus eupeus*

GU187953.1 *Mesobuthus eupeus*

HQ853233.1 *Mesobuthus eupeus*

FJ360814.1 *Buthus occitanus israelis*

FJ360816.1 *Buthus occitanus israelis*

AF481881.1 *Mesobuthus tamulus*

HQ288093.1 *Hottentotta judaicus*

AF481880.1 *Mesobuthus tamulus*

AF327643.1 *Buthus martensii*

AF419252.1 *Buthus martensii*

AF159976.1 *Buthus martensii*

AF079059.1 *Mesobuthus martensii*

AF135821.1 *Mesobuthus martensii*

0.4

 Episodically diversifying branch

 Bootstrap > 750

 Bootstrap ≤ 750
