# Supplementary figures and images for: Evolution Stings: The Origin and Diversification of Scorpion Toxin Peptide Scaffolds
Source: MDPI journal article supplement (doi:10.3390/toxins5122456), 2013-12-13

# Anionic

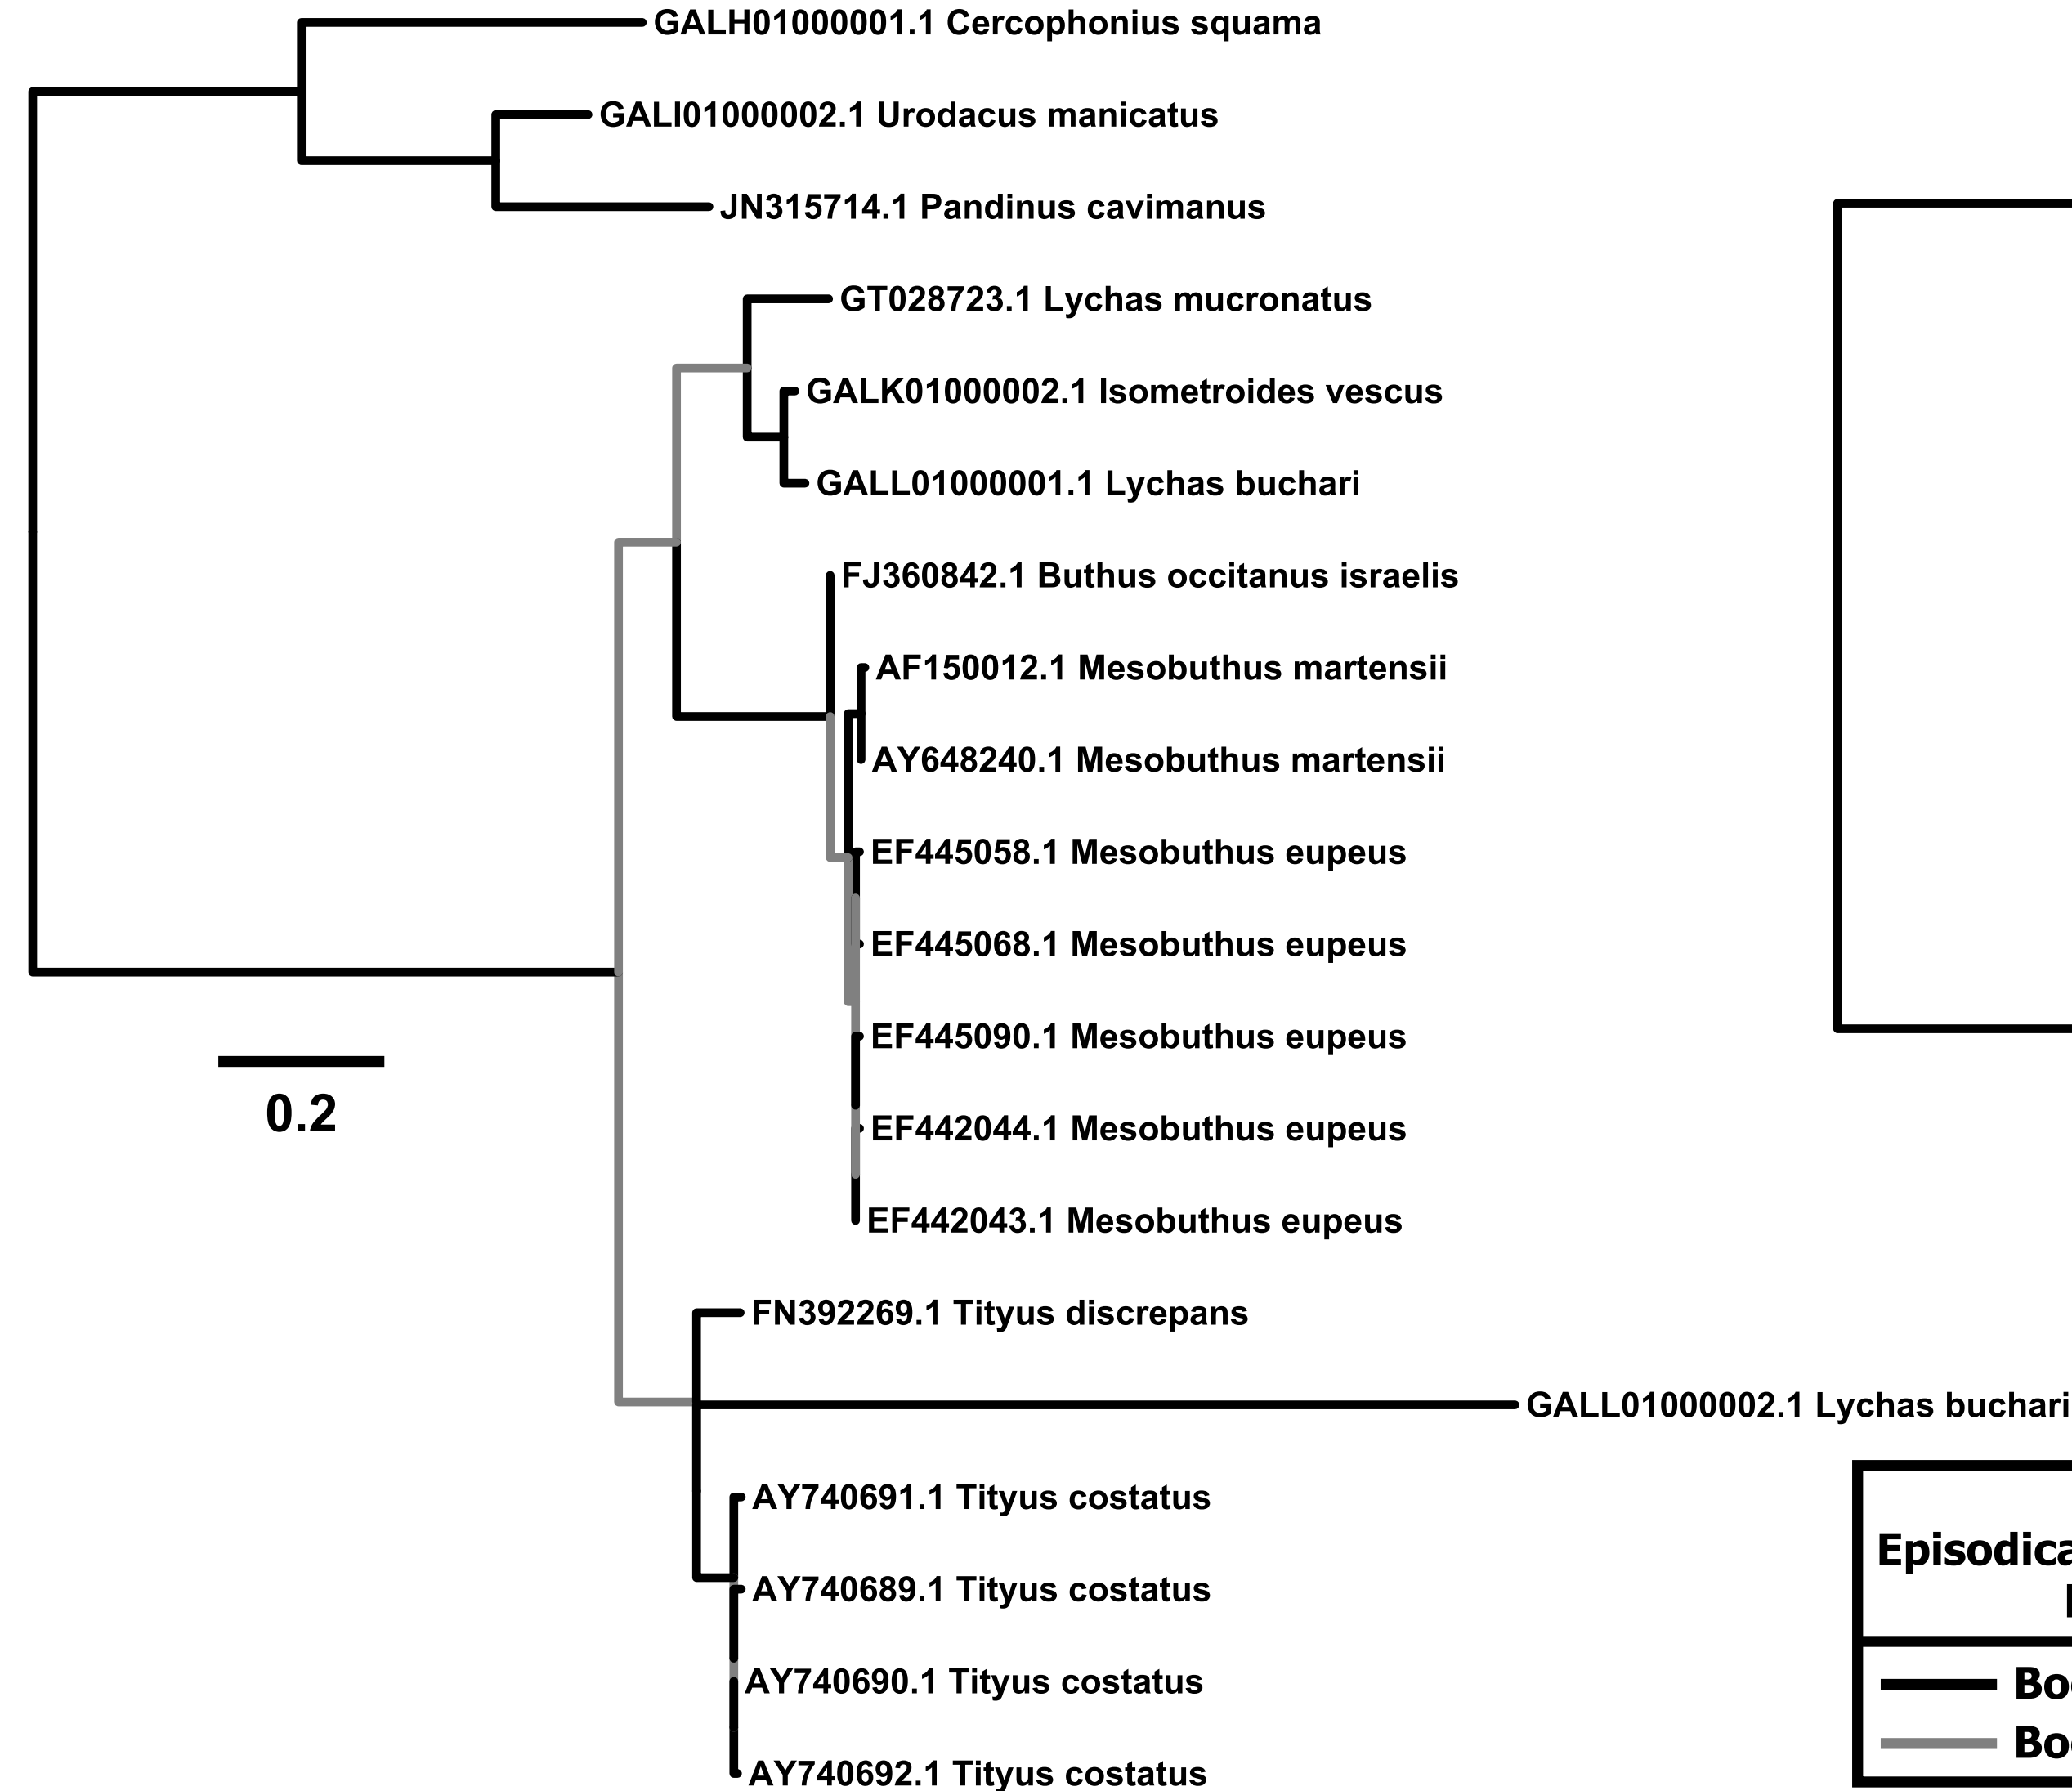

# Glycine-rich

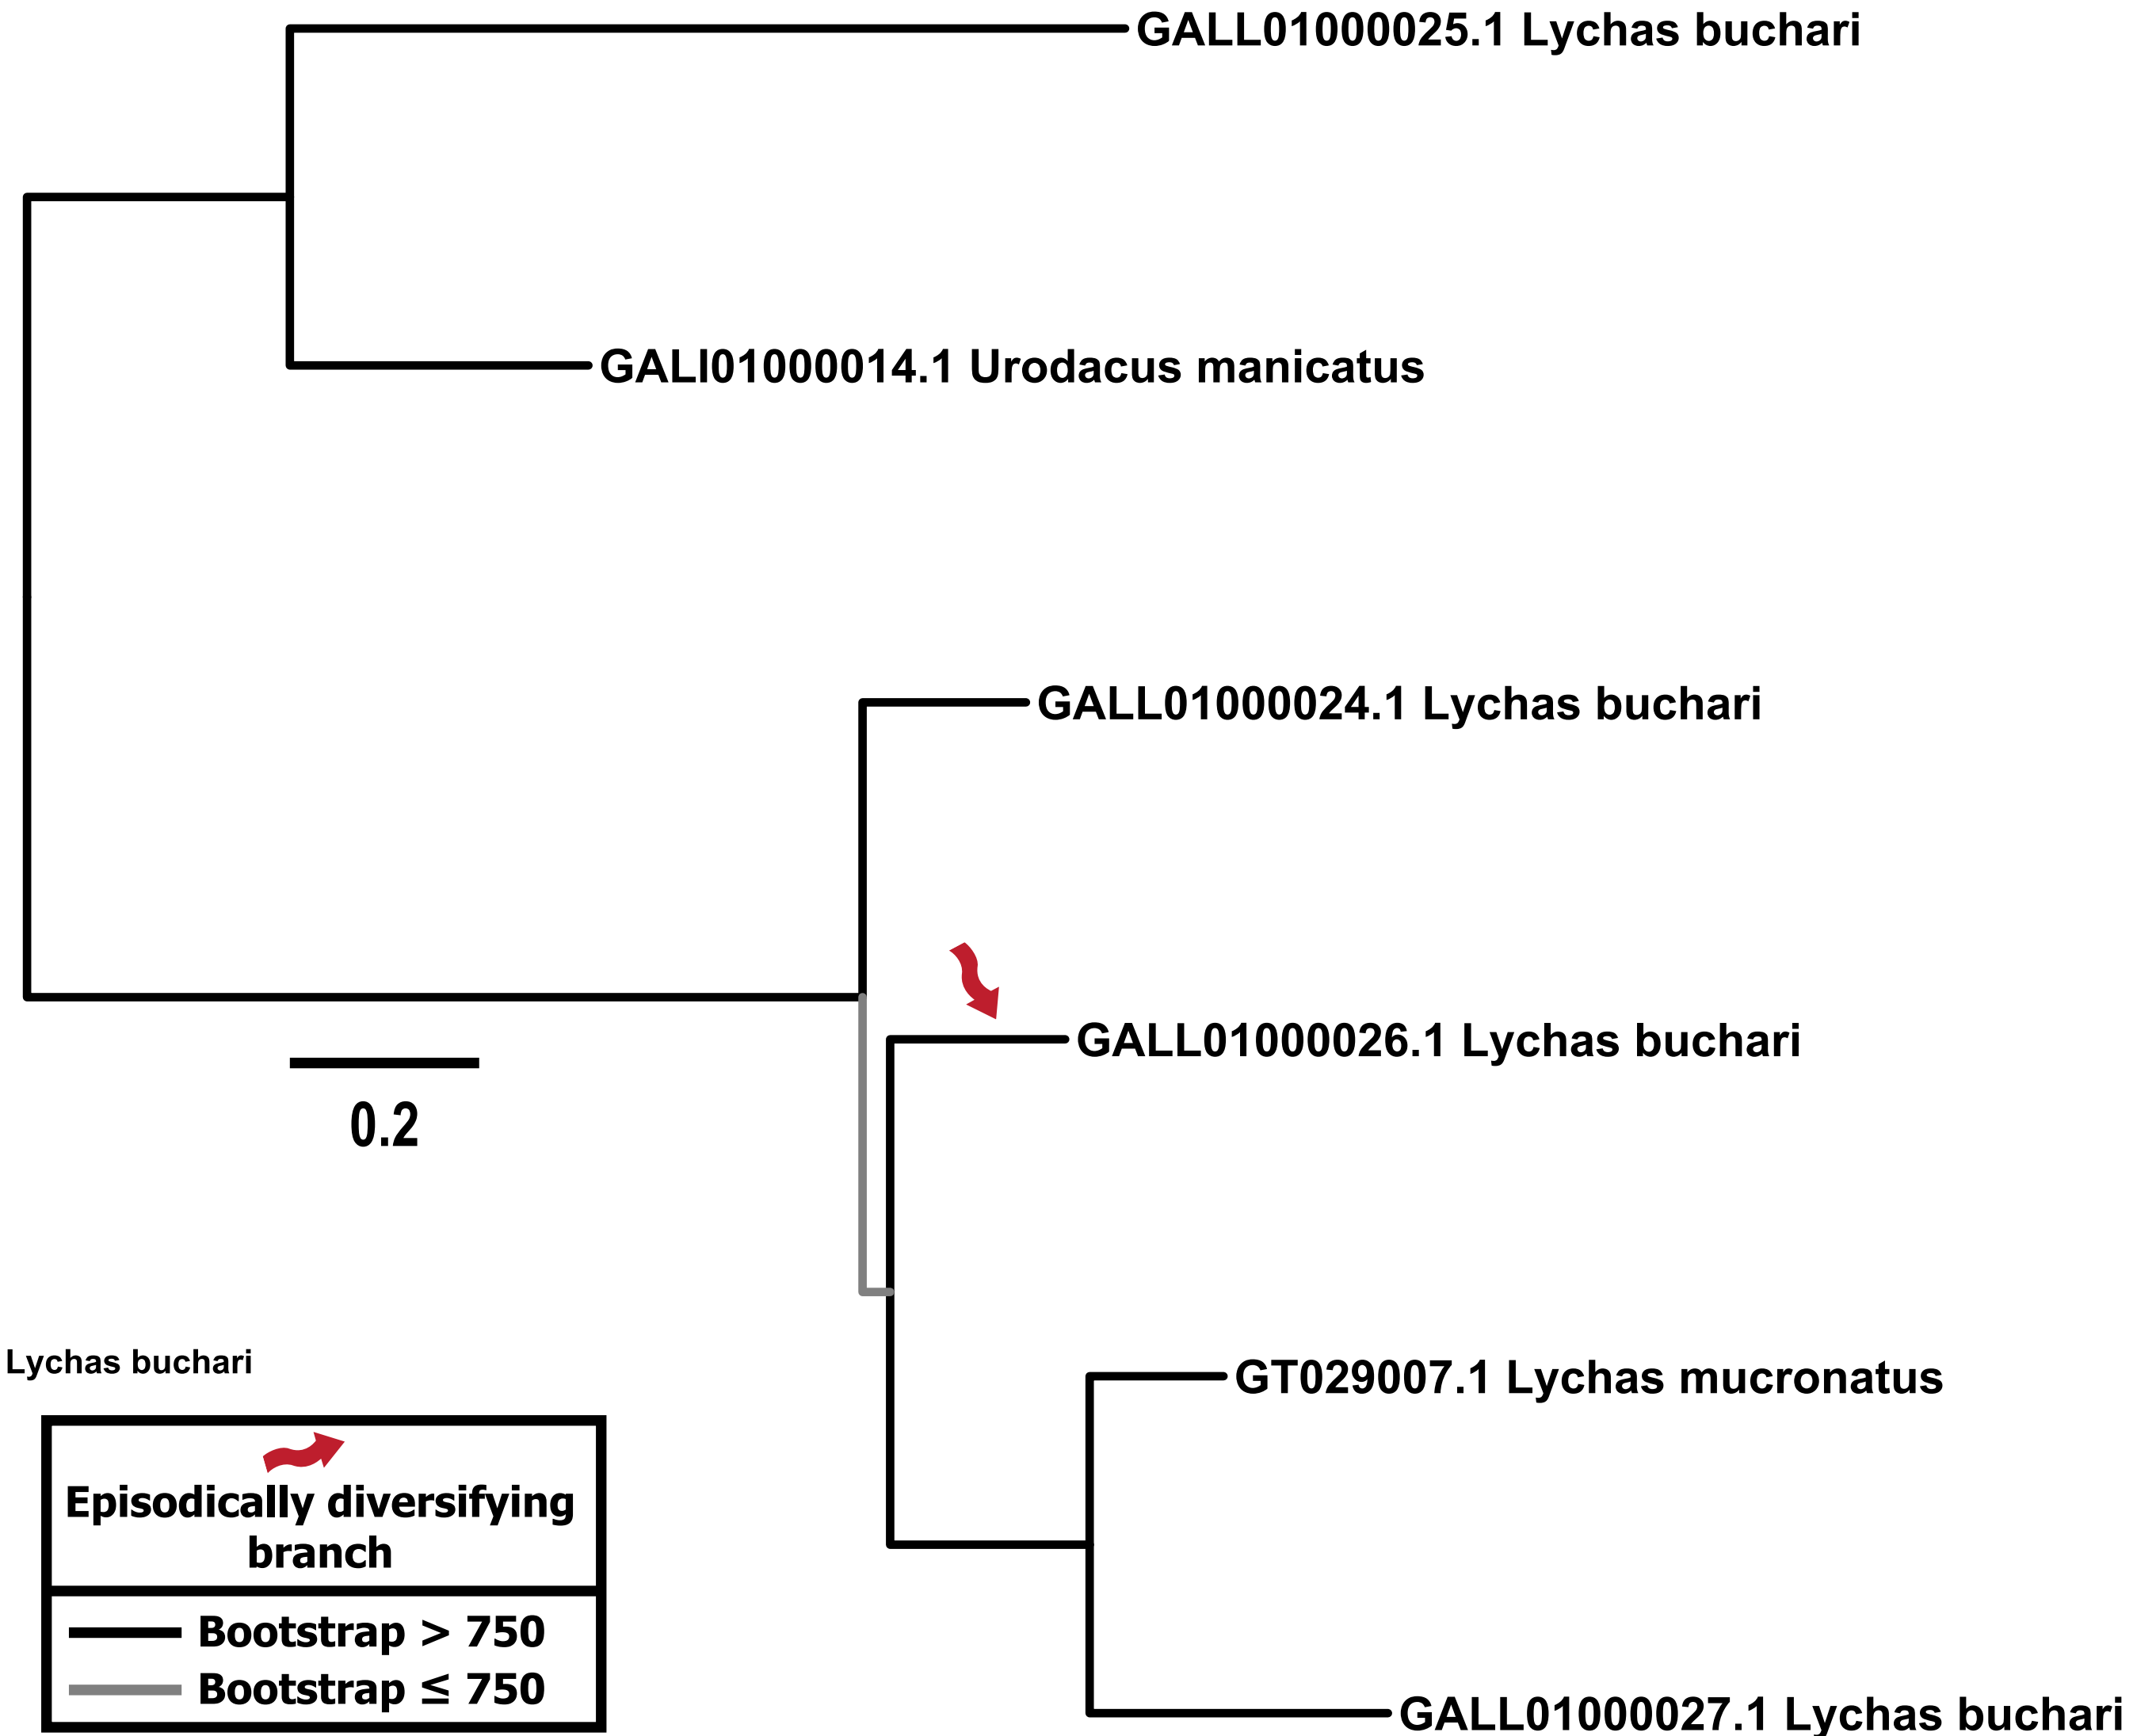

Supplement: s1 [file s1]

CYLIPs

AMP

Linear

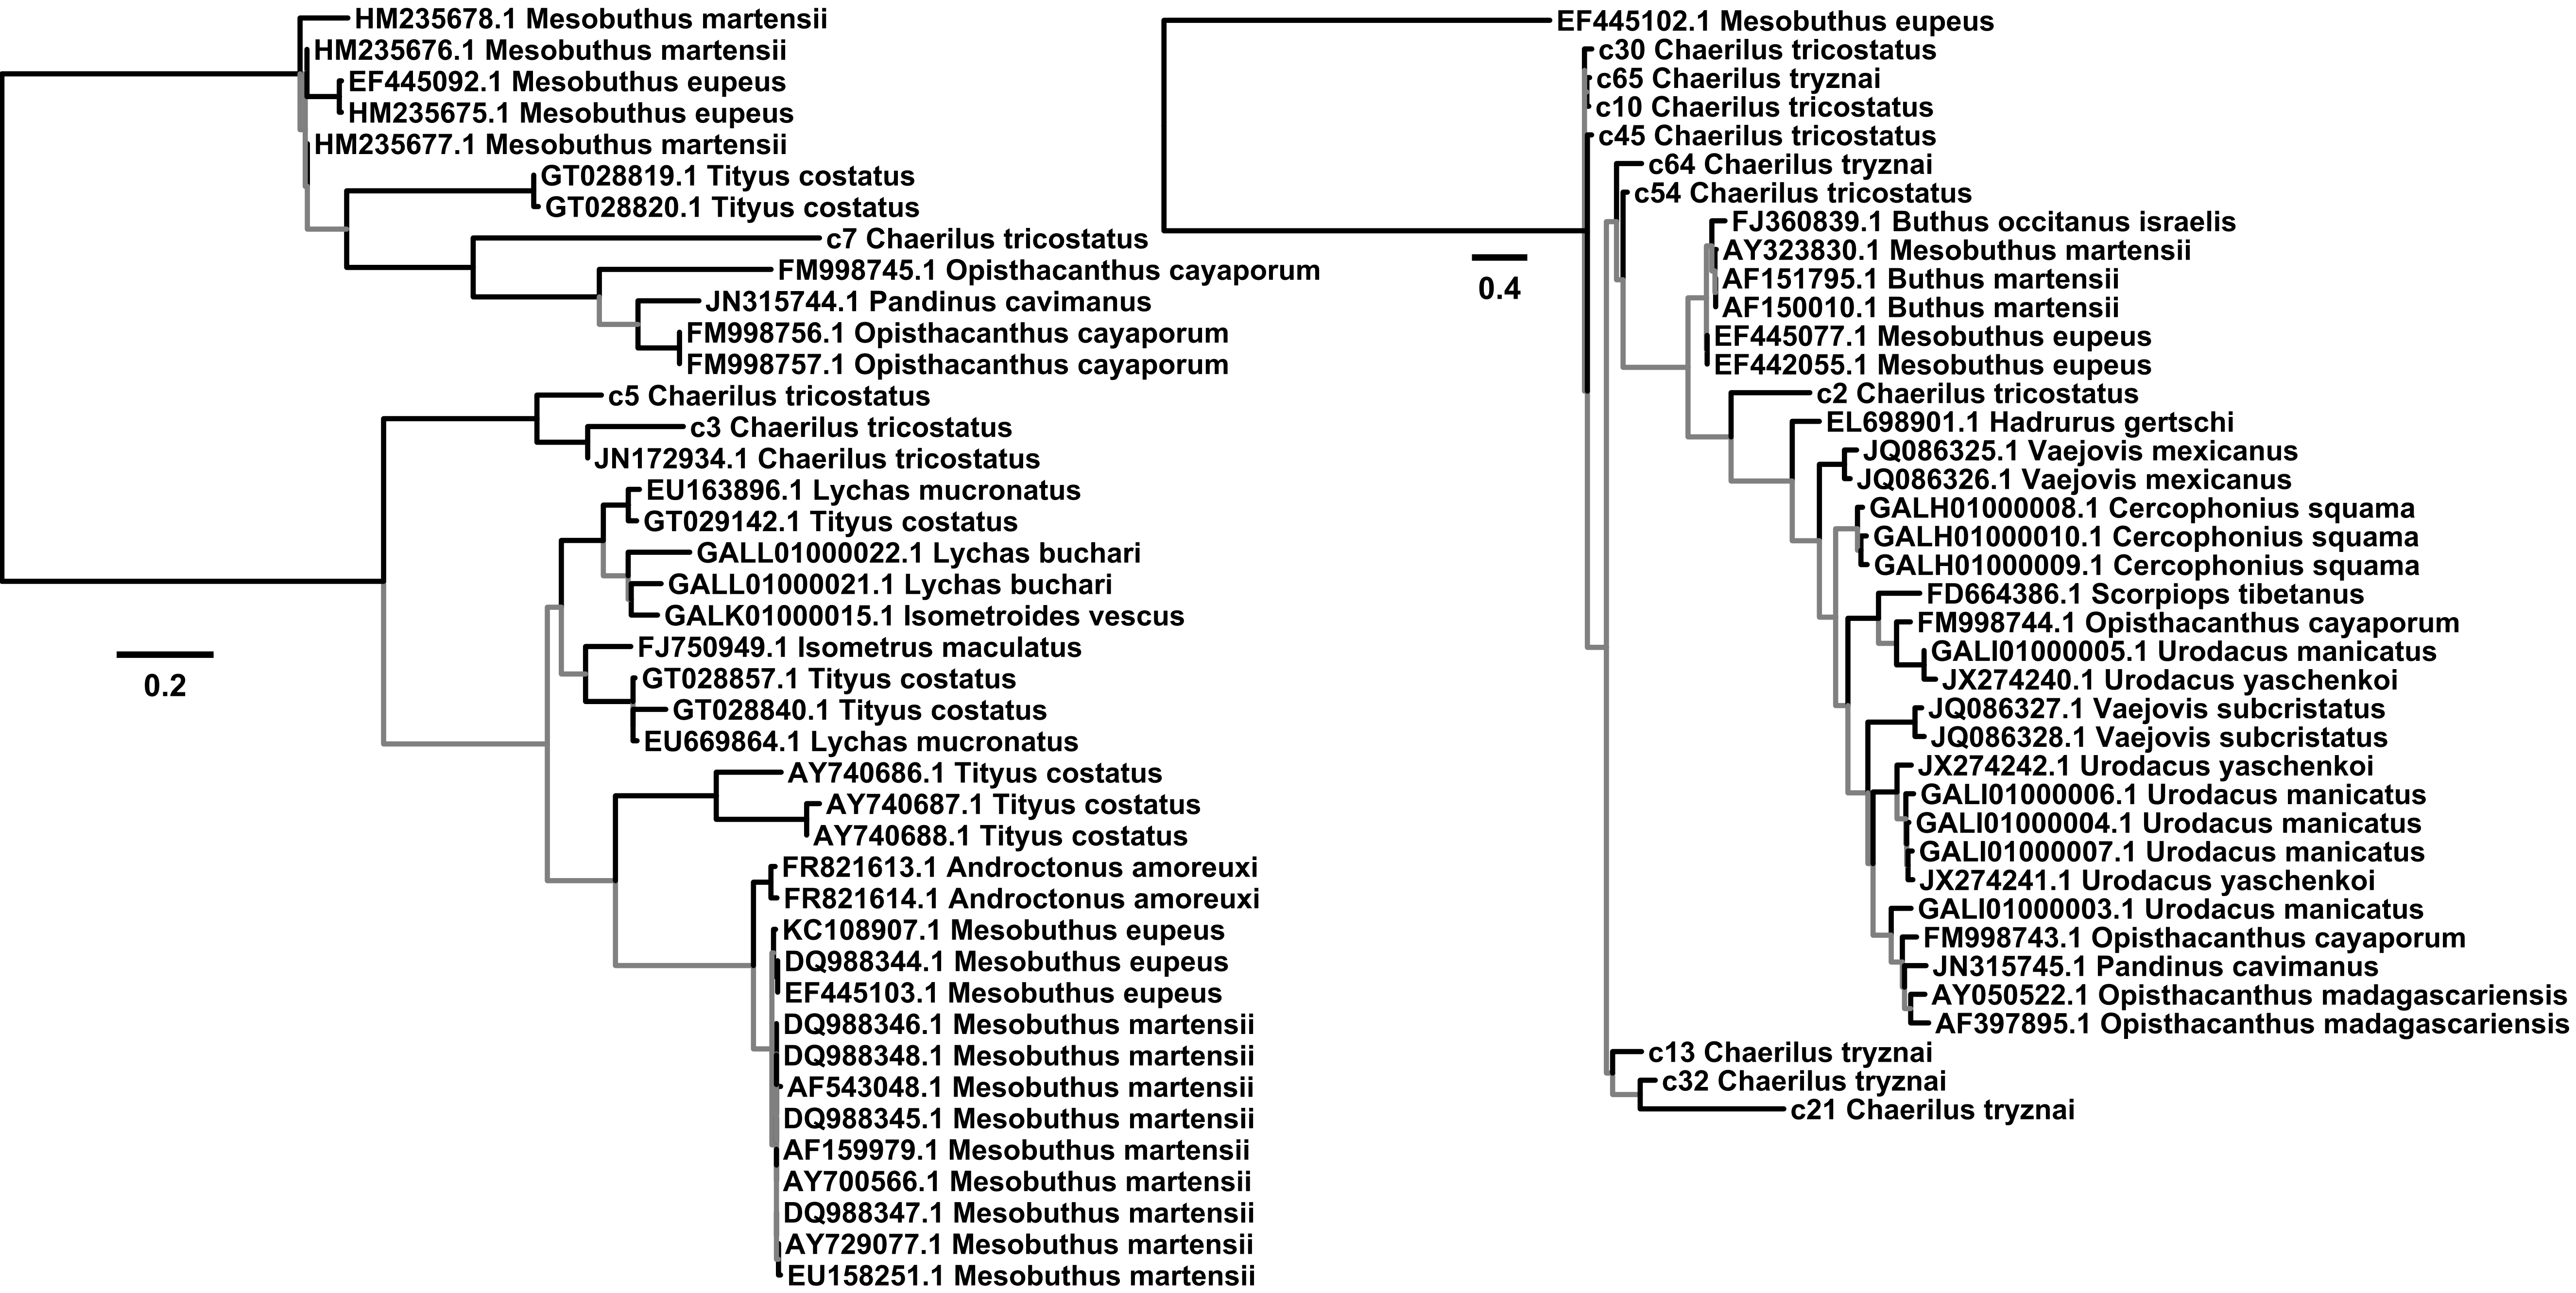

BPP

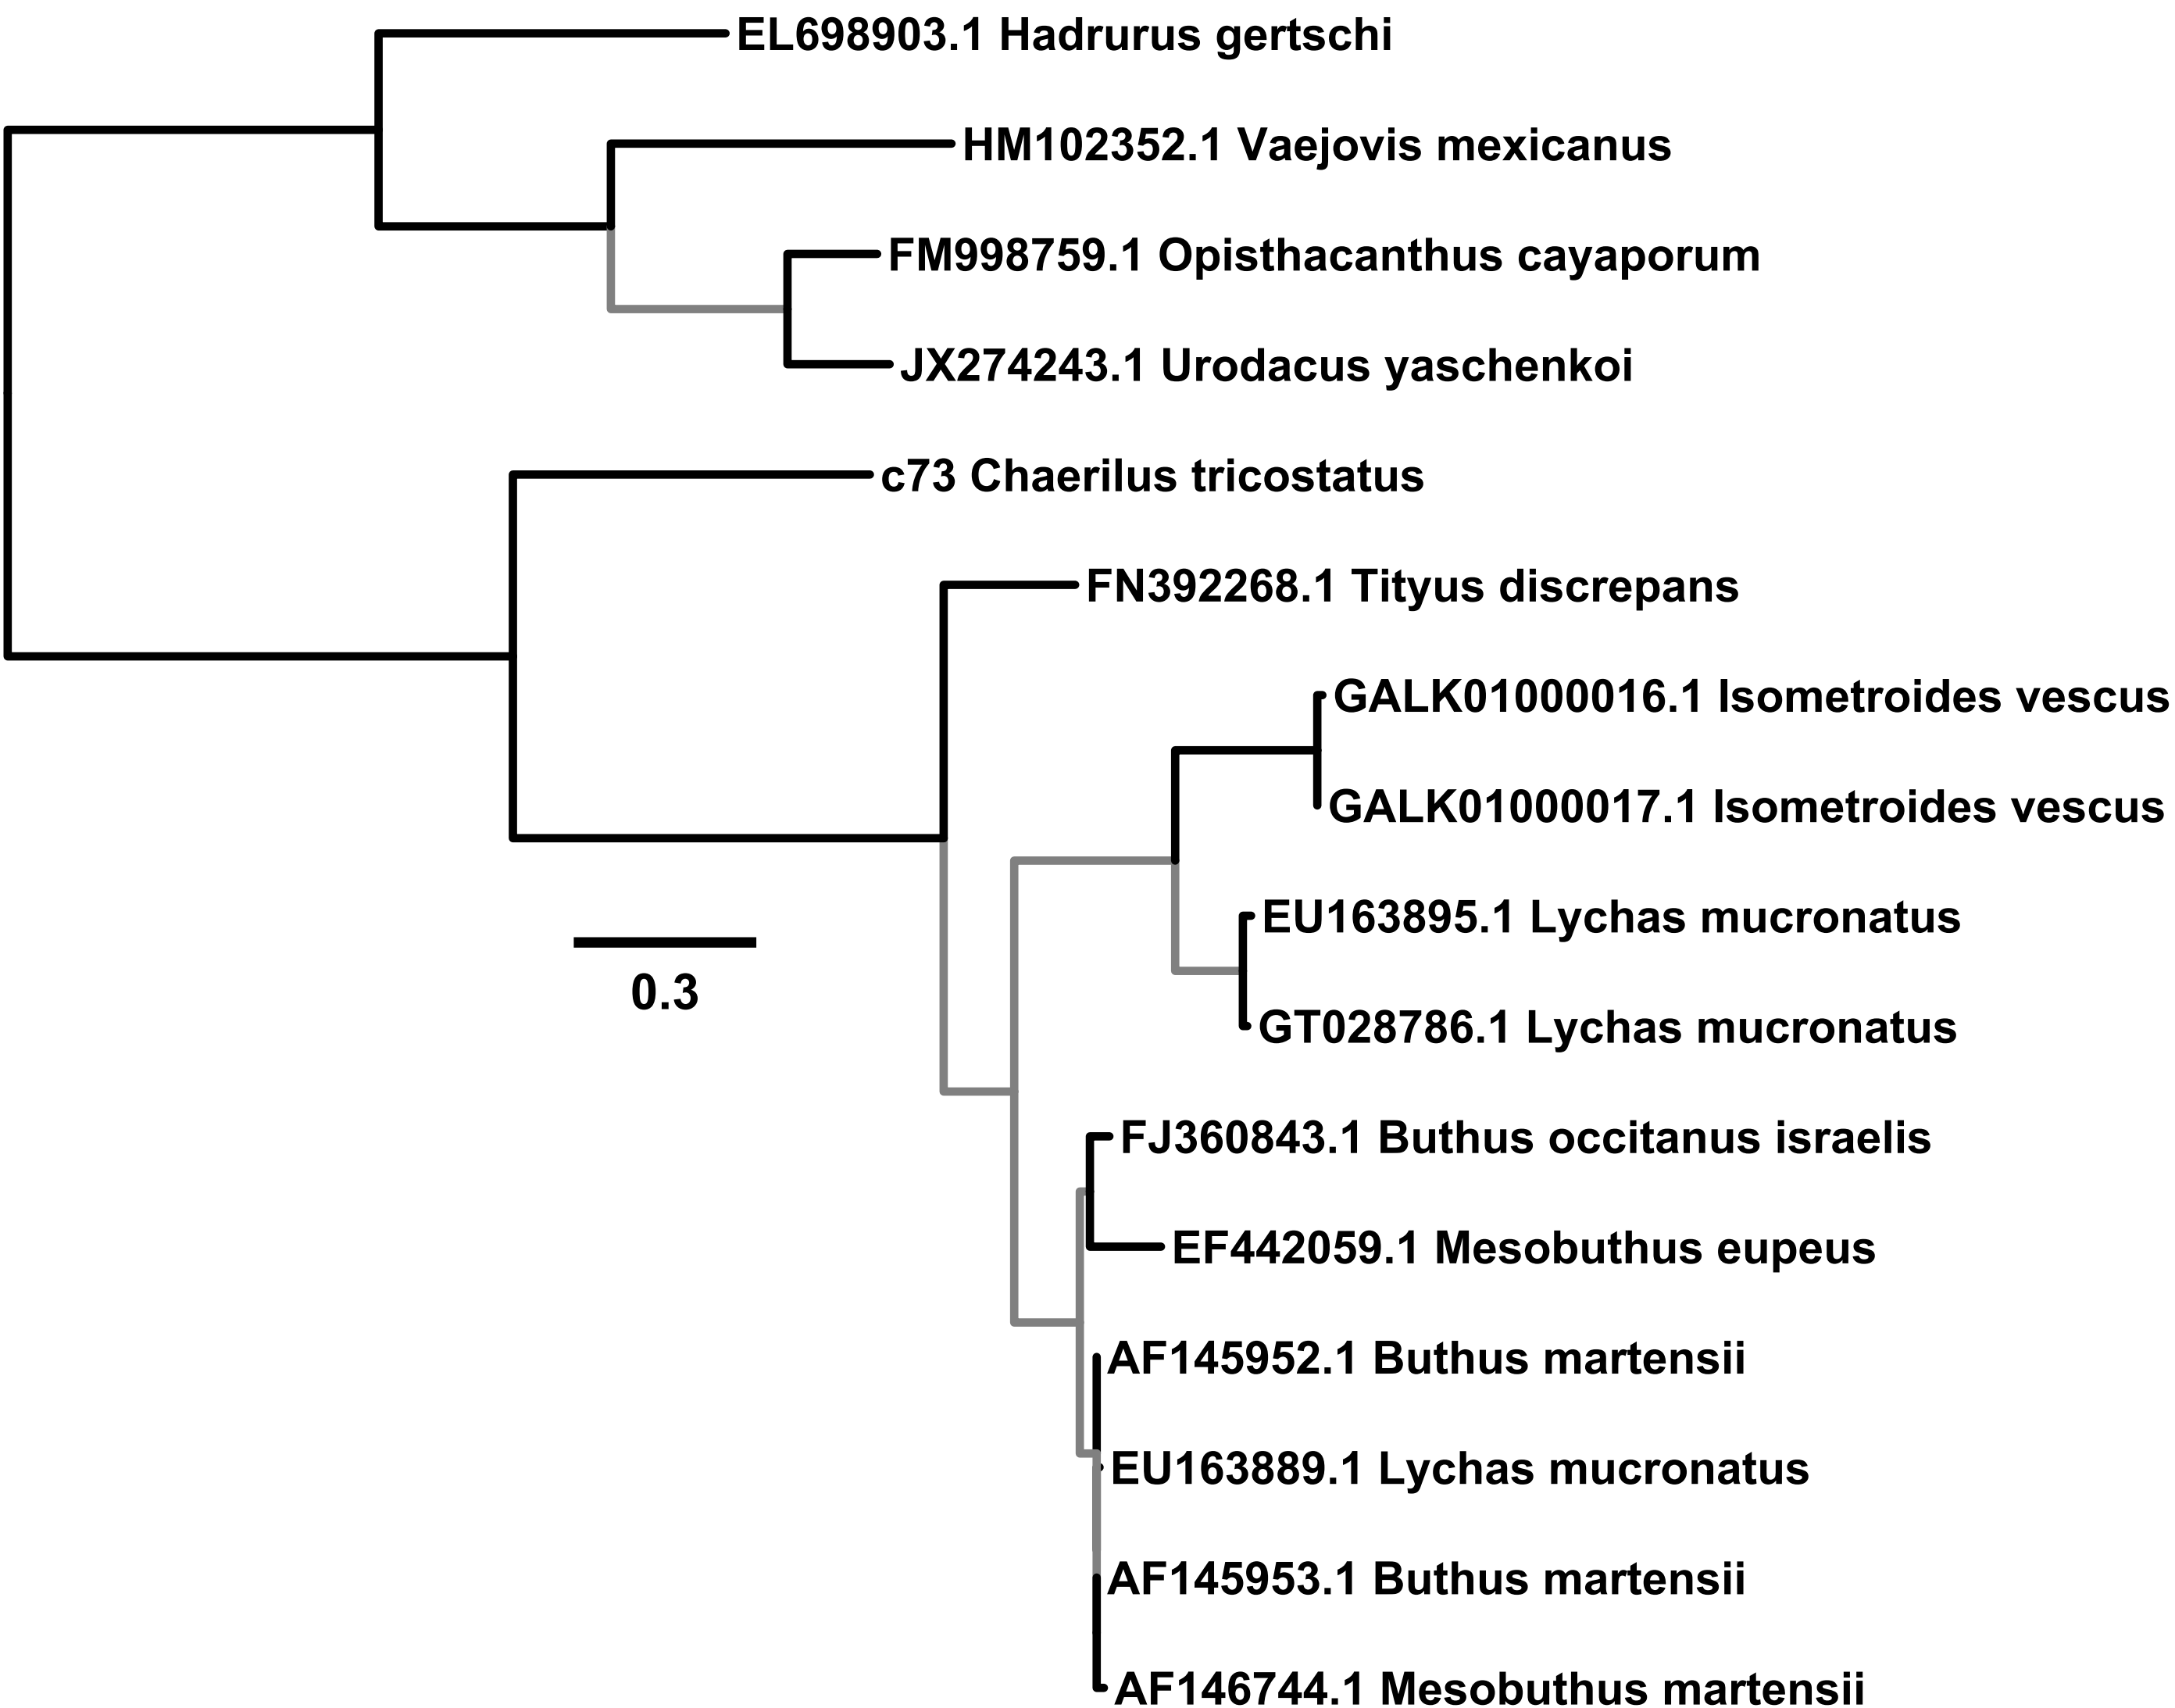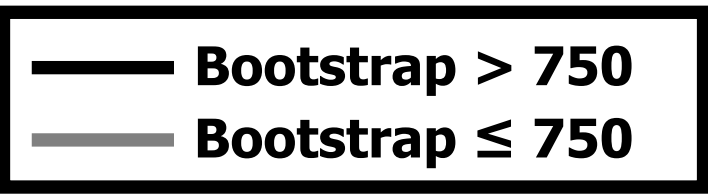

Supplement: s1 [file s1]

SV-SVC

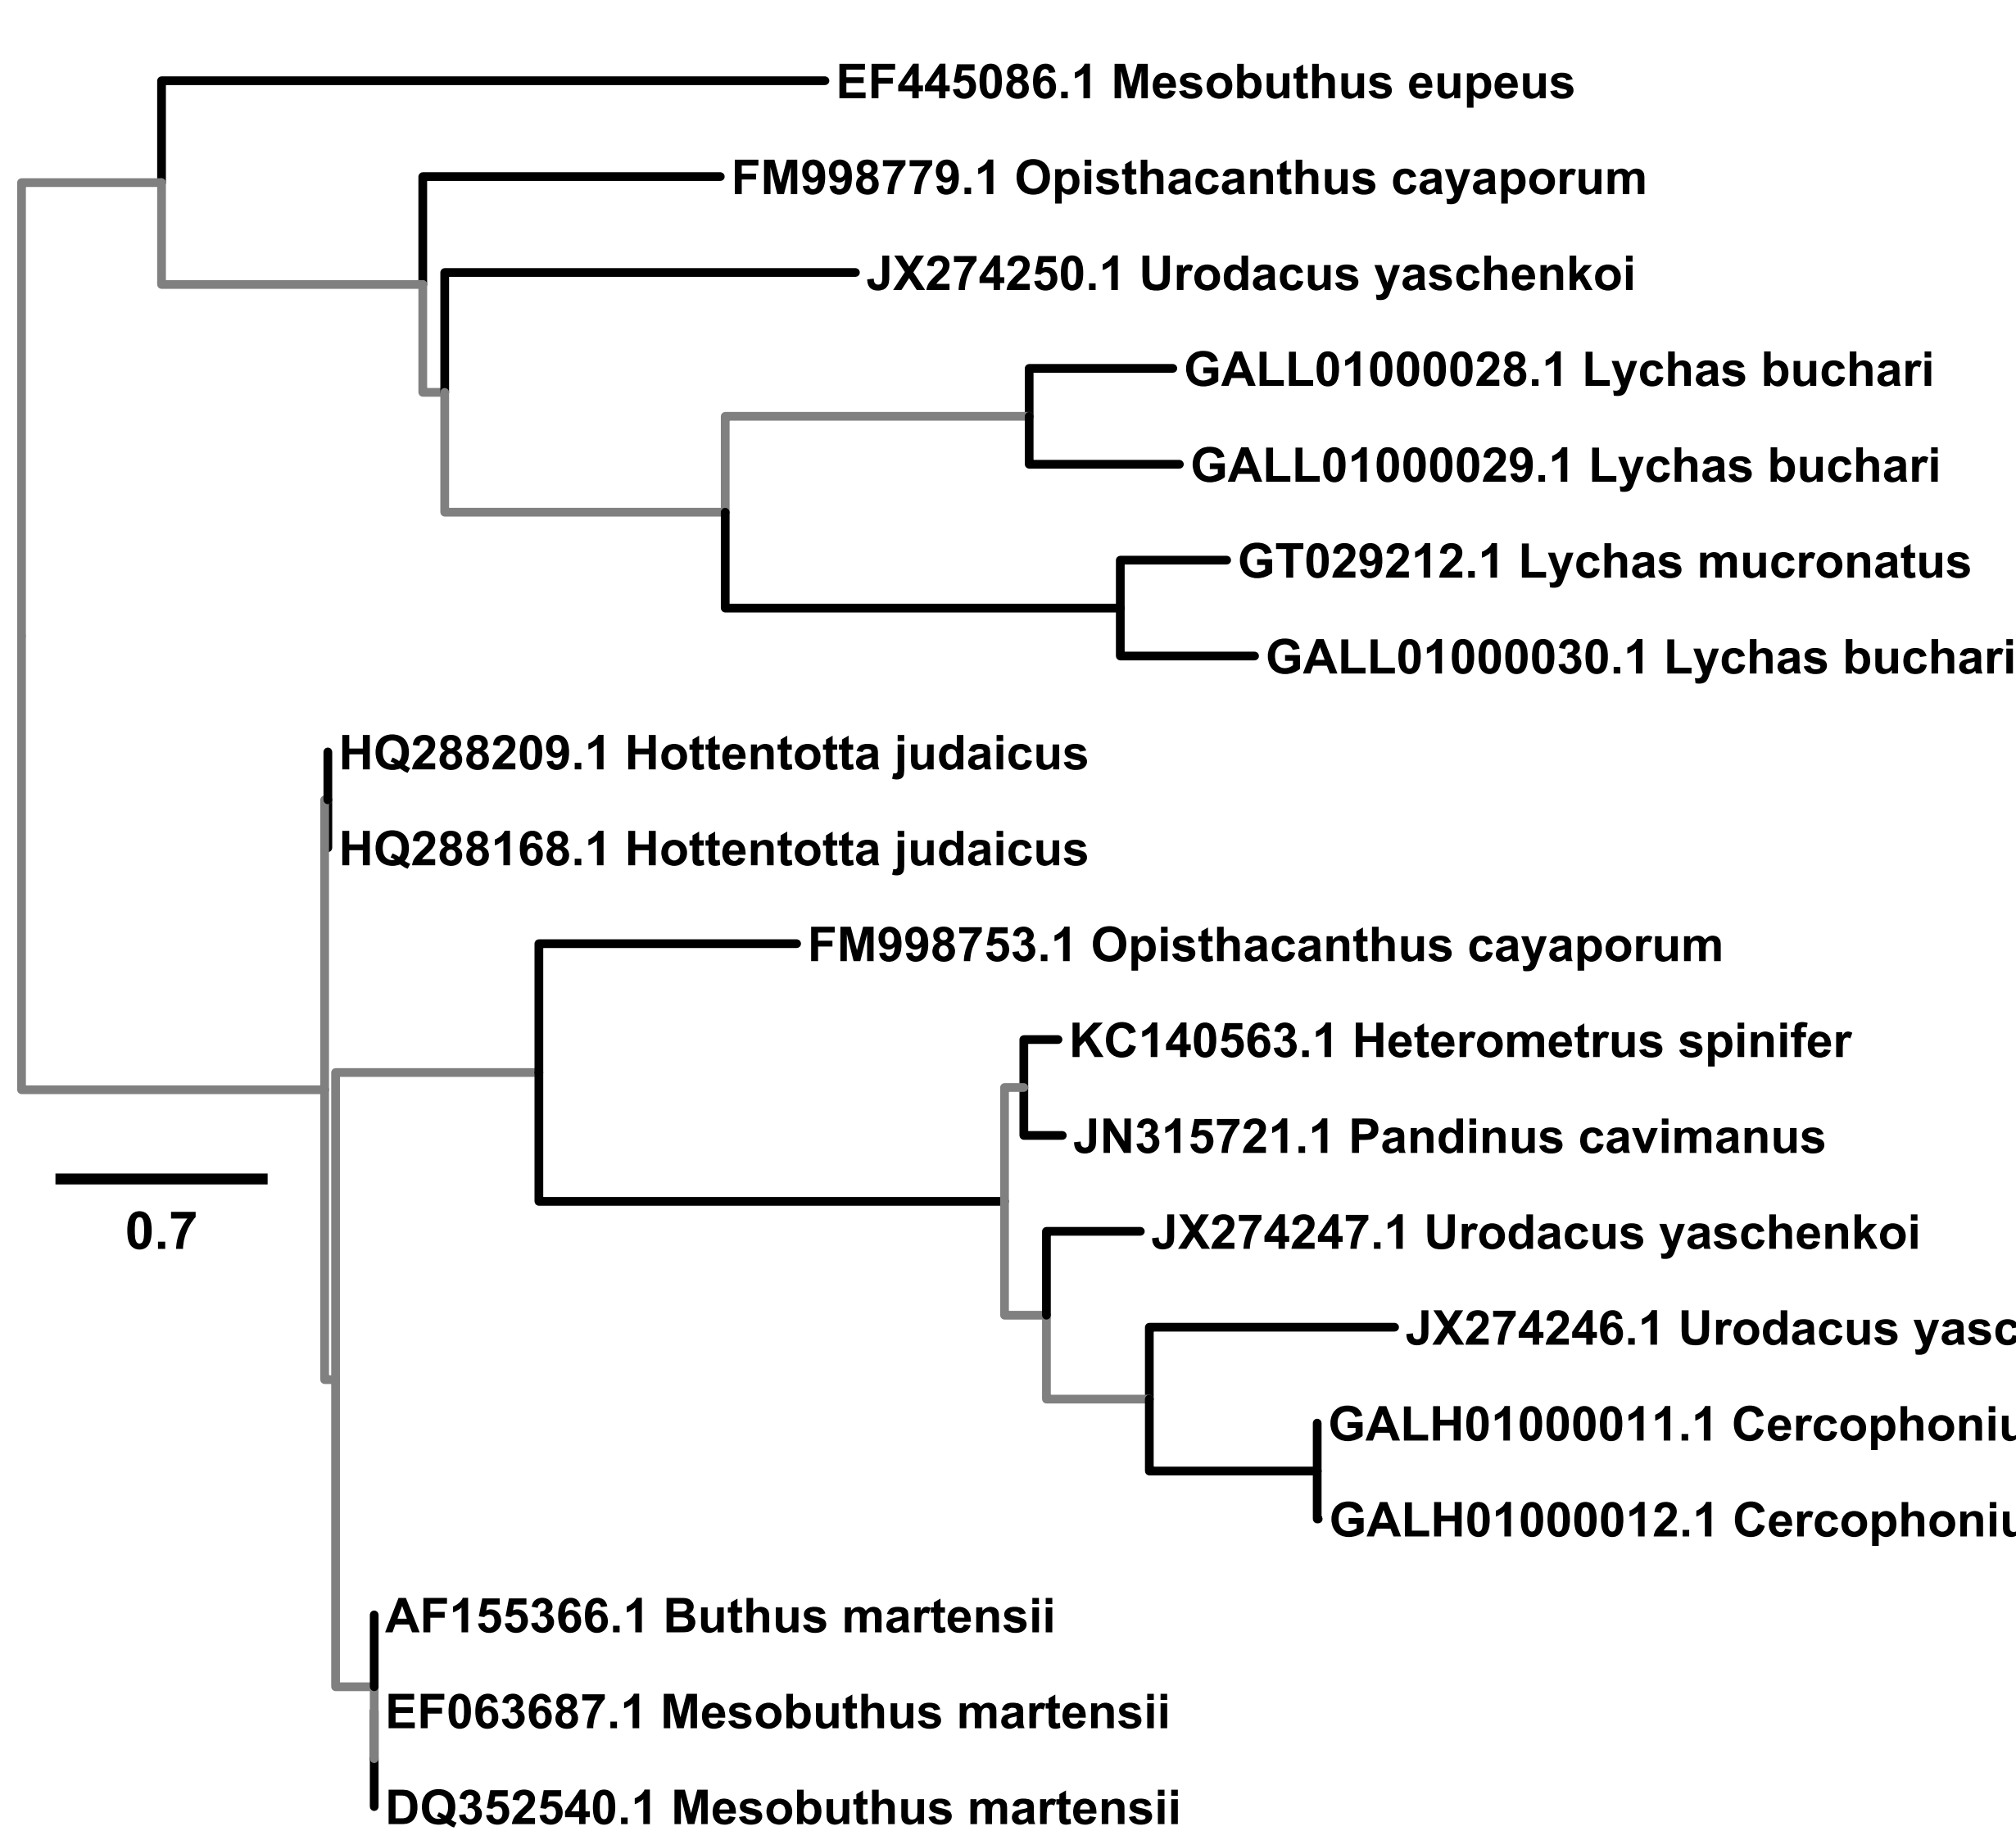

ICK

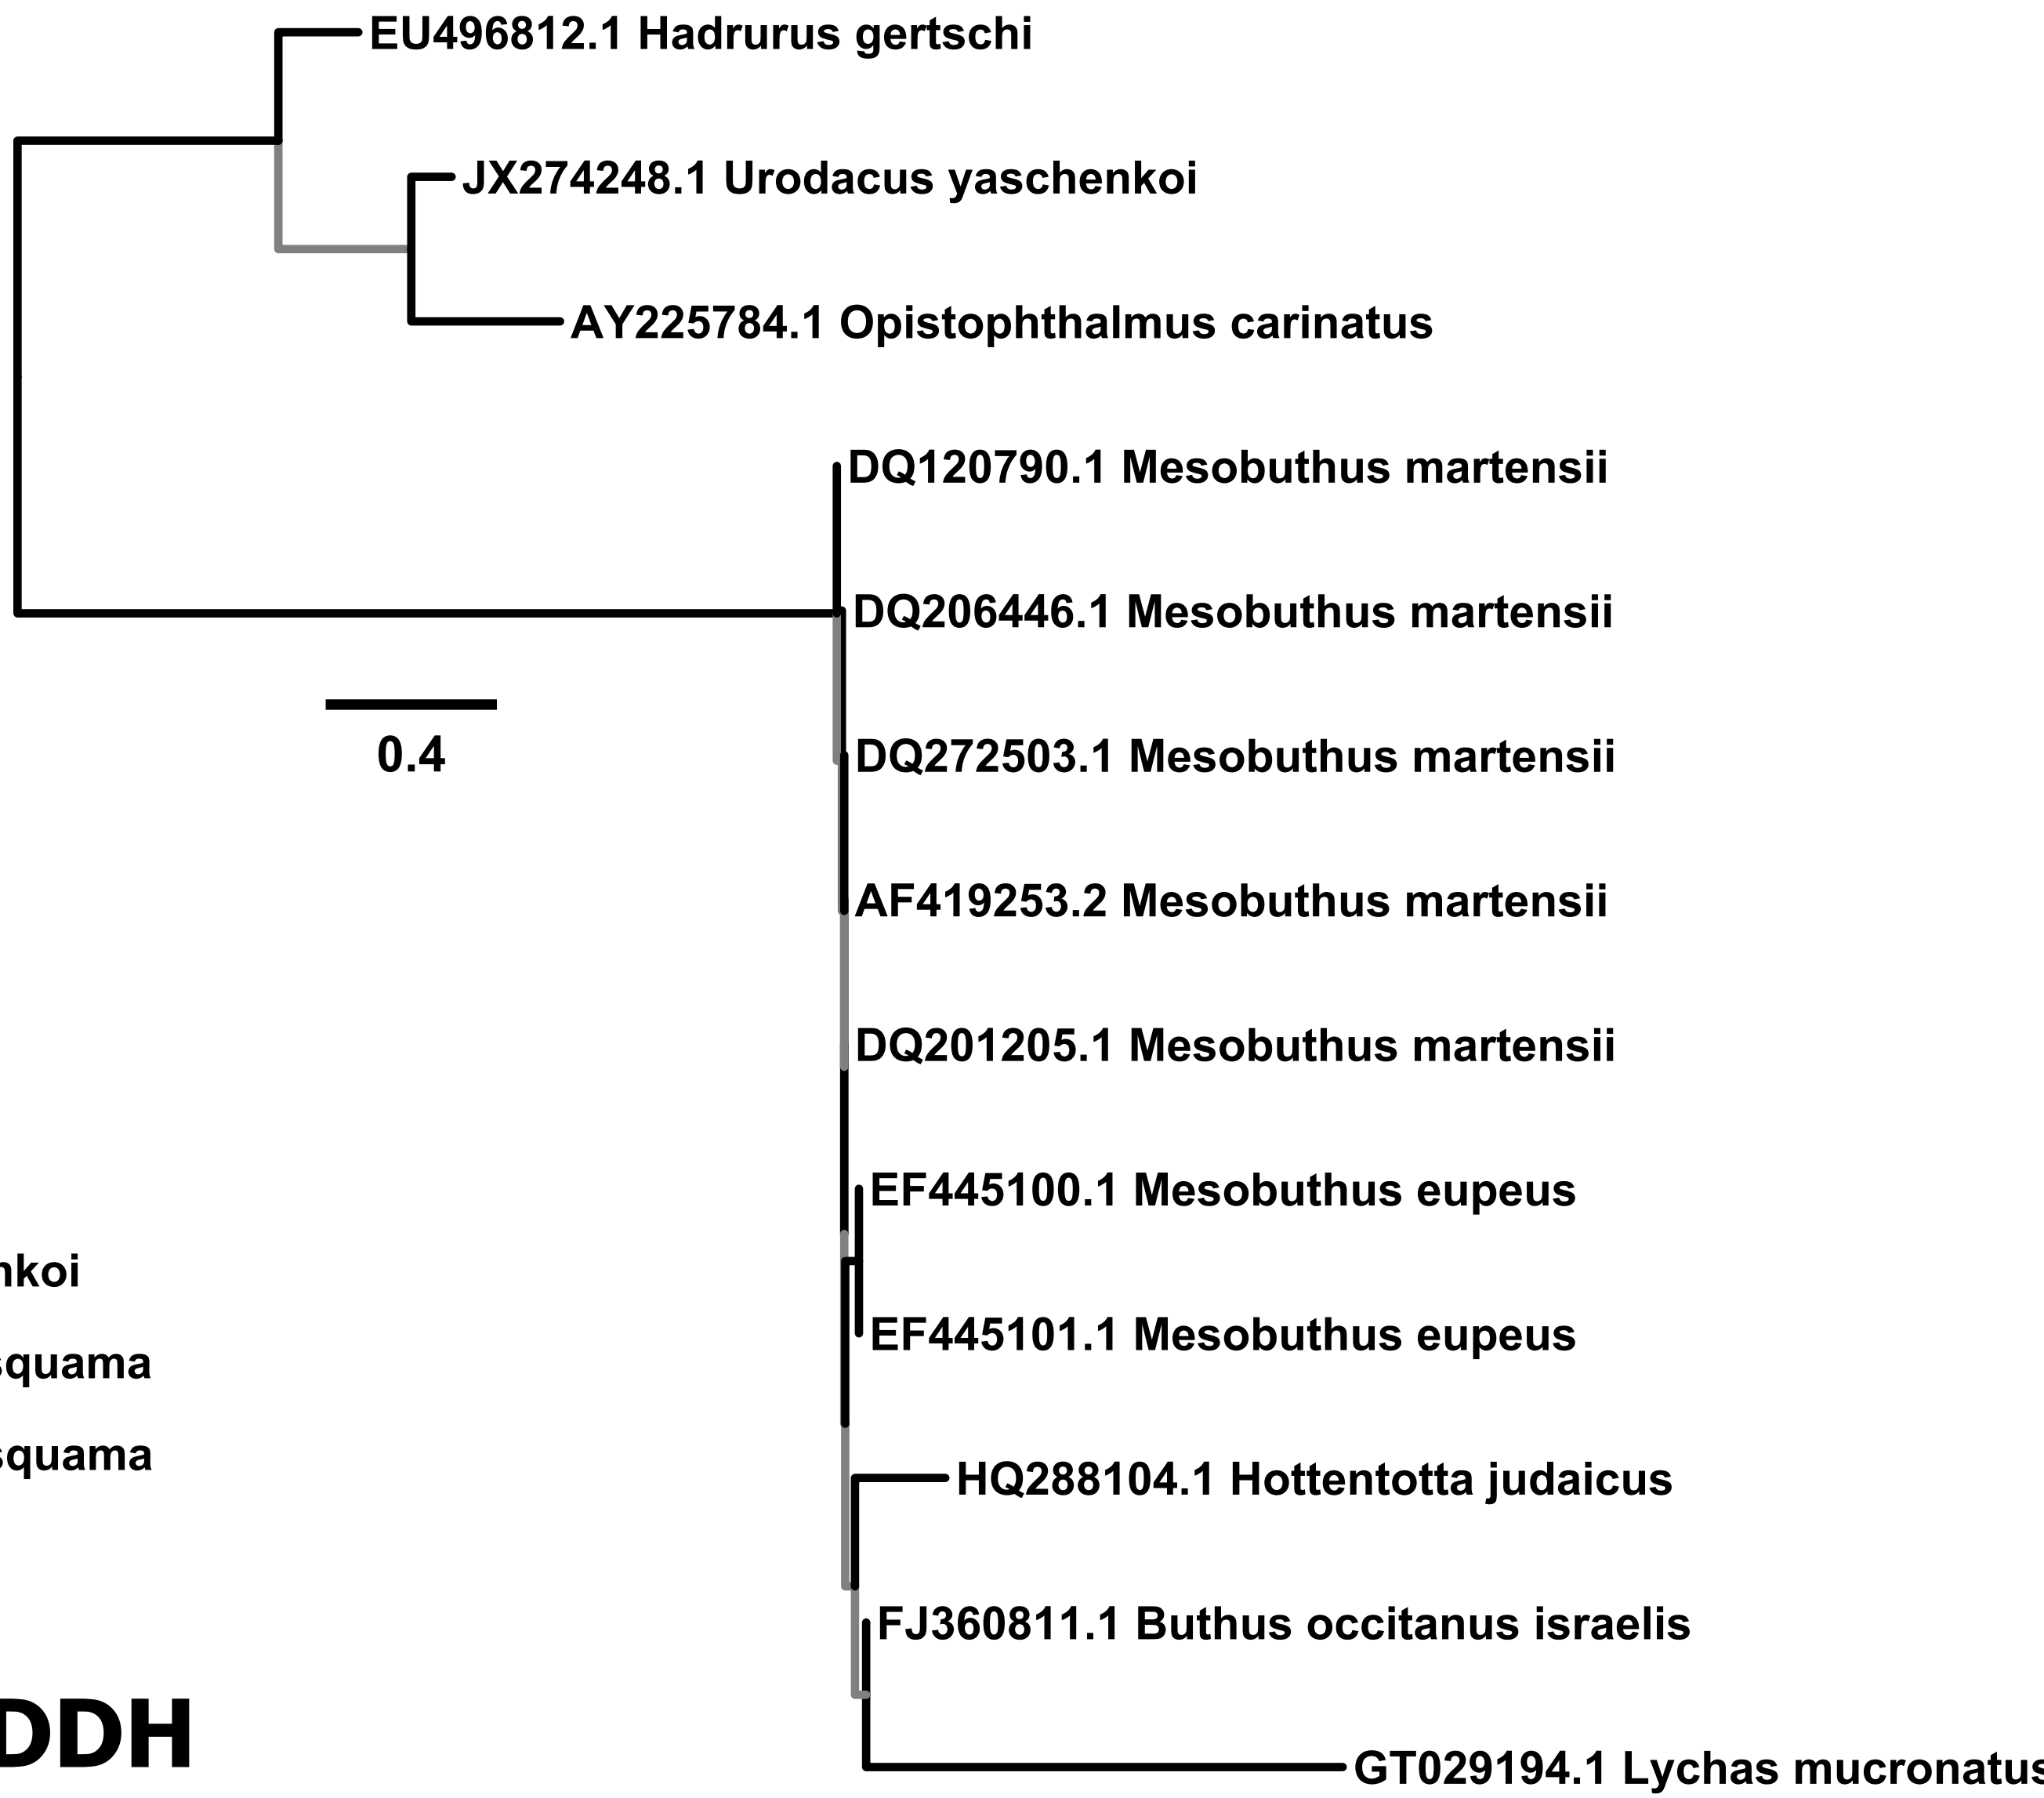

DDH

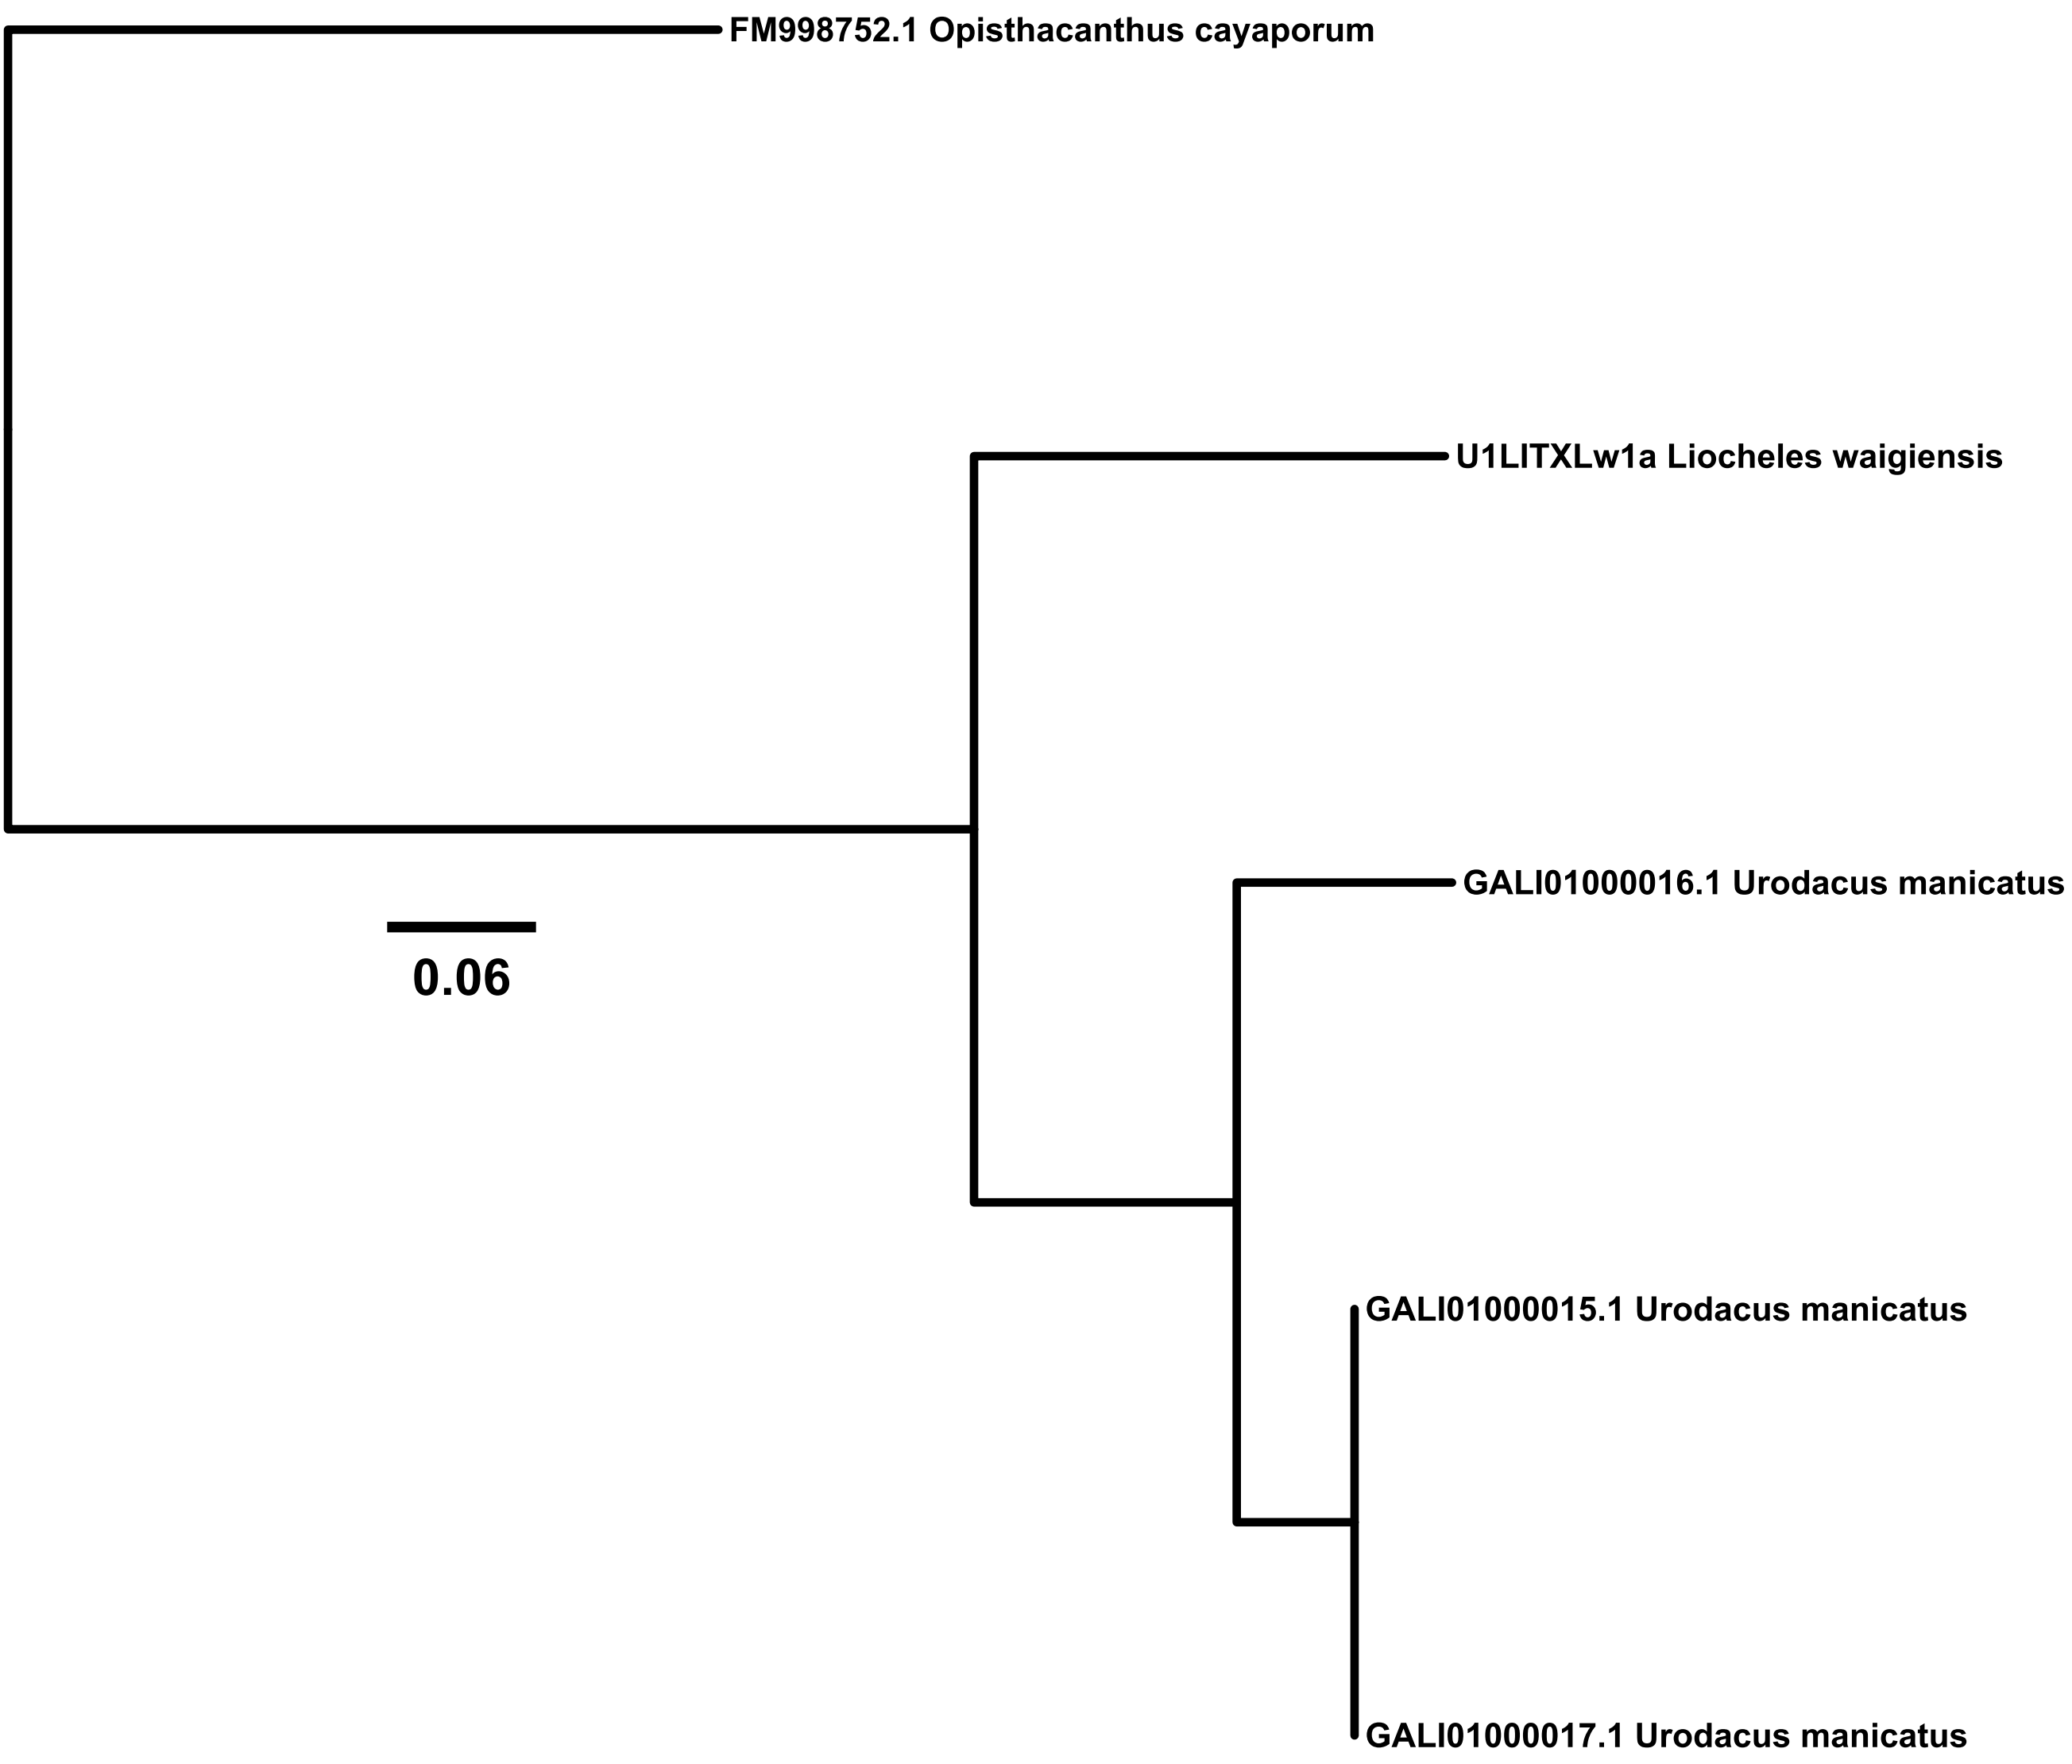

— Bootstrap > 750  
— Bootstrap ≤ 750

Supplement: s1 [file s1]

Short K<sub>v</sub> CS $\alpha/\beta$

Long K<sub>v</sub> CS $\alpha/\beta$

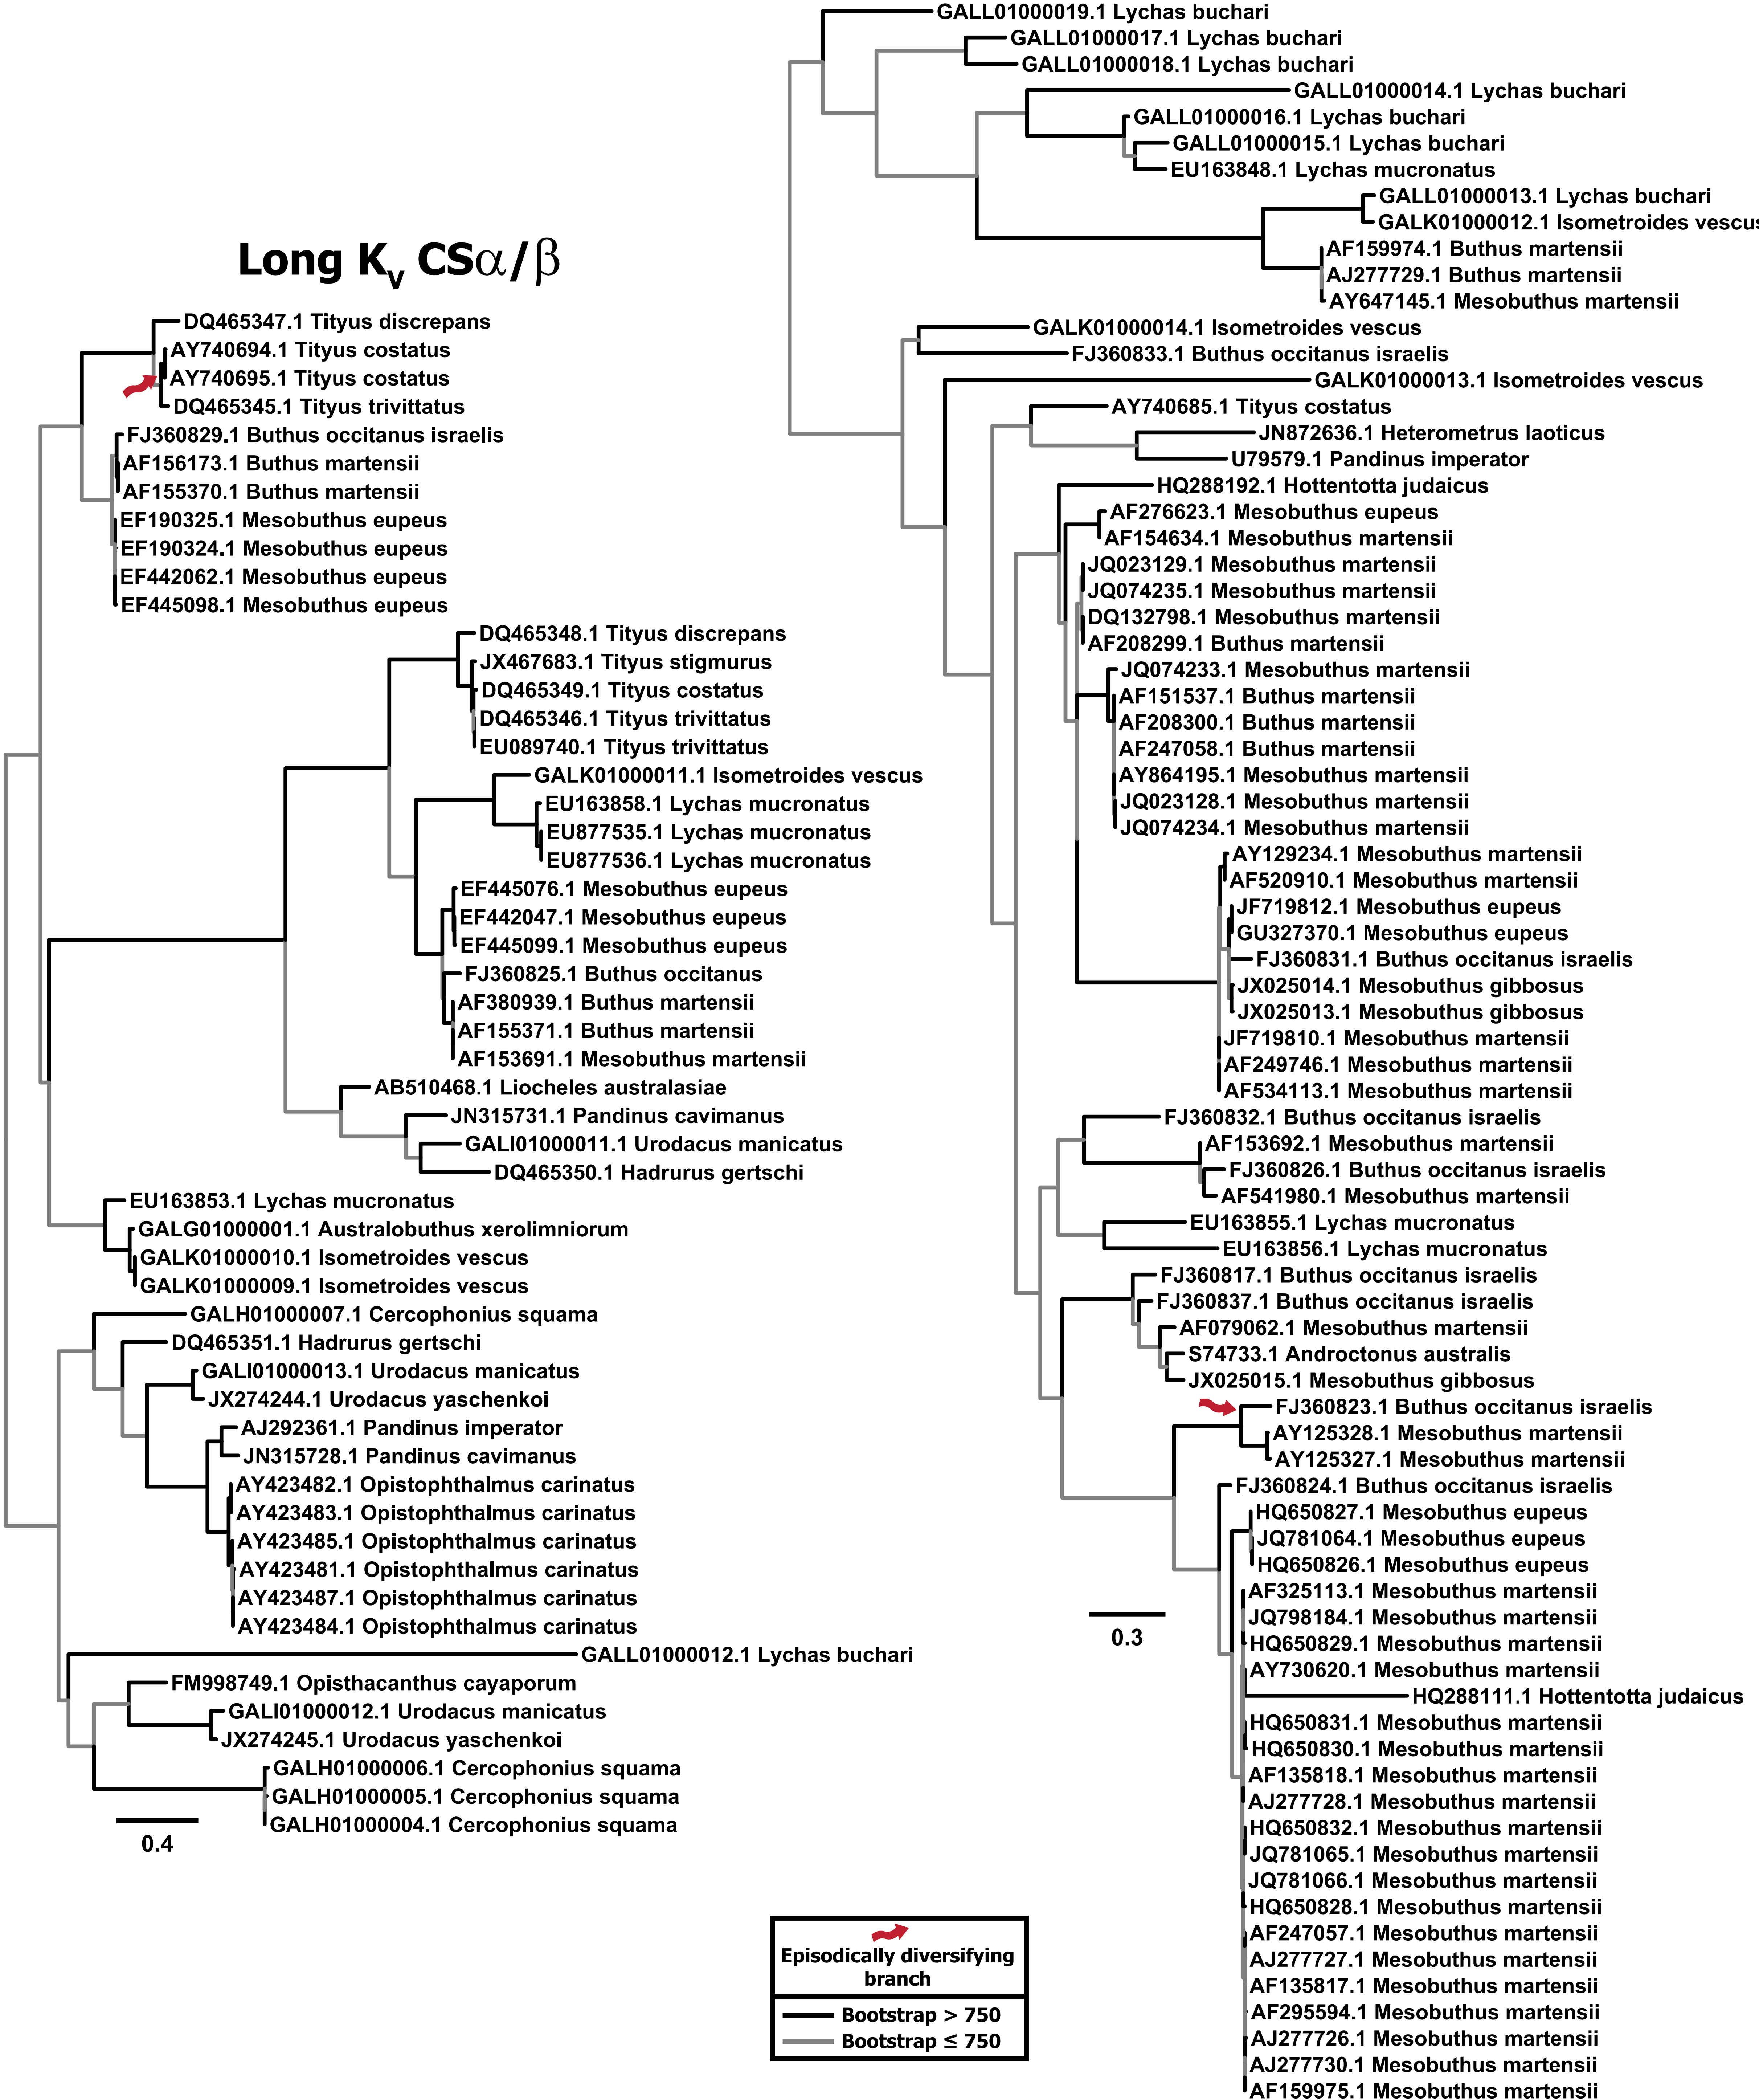

Supplement: s1 [file s1]
